1 Running head: POLYGENIC RISK, NEURODEVELOPMENT AND RESILIENCE

2

3 Psychological Resilience in Adolescence as a function of Genetic Risk for Major

4 Depressive Disorder and Alzheimer's Disease

5 Raluca Petrican<sup>1\*</sup> and Alex Fornito<sup>2</sup>

6 <sup>1</sup>Cardiff University Brain Research Imaging Centre (CUBRIC), School of Psychology,

7 Cardiff University, Maindy Road, Cardiff, CF24 4HQ, United Kingdom, email:

8 [petricanr@cardiff.ac.uk](mailto:petricanr@cardiff.ac.uk). <sup>2</sup>The Turner Institute for Brain and Mental Health, School of

9 Psychological Sciences, and Monash Biomedical Imaging, Monash University, Melbourne,

10 VIC, Australia., email: [alex.fornito@monash.edu](mailto:alex.fornito@monash.edu)

11 \*Corresponding author email address: [petricanr@cardiff.ac.uk](mailto:petricanr@cardiff.ac.uk) (R.P.).

12 **Conflict of interest.** The authors declare no competing interests.

13 Abstract

14 Major Depressive Disorder (MDD) and Alzheimer’s Disease (AD) are two pathologies linked  
15 to prior stress exposure and altered neurodevelopmental trajectories. As a putative antecedent  
16 to AD, MDD could be key to understanding the neurobiological changes that precede the  
17 clinical onset of AD by decades. To test this hypothesis, we used longitudinal data from the  
18 Adolescent Brain and Cognitive Development study ( $N_{\text{total}} = 980, 470$  females) and  
19 investigated overlapping connectomic, transcriptomic, and chemoarchitectural correlates of  
20 adjustment to stressors (i.e., resilience) among adolescents at genetic risk for AD and MDD,  
21 respectively. The potential for perinatal adversity to directly and/or indirectly, via accelerated  
22 biological ageing, foster resilience (i.e., “inoculation” effects) was also probed. We identified  
23 two distinguishable neurodevelopmental profiles predictive of resilience among MDD-  
24 vulnerable adolescents. One profile, expressed among the fastest developing youth,  
25 overlapped with areas of greater dopamine receptor density and reflected the maturational  
26 refinement of the inhibitory control architecture. The second profile distinguished resilient  
27 MDD-prone youth from psychologically vulnerable adolescents genetically predisposed  
28 towards AD. This profile, associated with elevated GABA, relative to glutamate, receptor  
29 density, captured the longitudinal refinement and increasing context specificity of incentive-  
30 related brain activations. Its transcriptomic signature implied that poorer resilience among  
31 AD-prone youth may be associated with greater expression of MDD-relevant genes. Our  
32 findings are compatible with the proposed role of MDD as a precursor to AD and underscore  
33 the pivotal contribution of incentive processing to this relationship. They further speak to the  
34 key neuromodulatory role of DA-gonadal hormone interactions in fostering resilience in  
35 adolescence.

36 **Keywords:** Psychological Resilience; Major Depressive Disorder; Alzheimer’s Disease;  
37 Adolescent Development; Polygenic Risk; Transcriptomics.

38 Significance Statement

39 Environmental stressors can substantially alter brain maturation and incur lifelong costs.  
40 Using longitudinal data, we characterise two developmental profiles correlated with positive  
41 adjustment to environmental challenges (i.e., resilience) among adolescents at genetic risk for  
42 two stress-related conditions, Alzheimer’s Disease (AD) and Major Depressive Disorder  
43 (MDD), respectively. One dopamine-related profile typified the fastest developing MDD-  
44 prone adolescents and reflected the neural maturation of the inhibitory control architecture.  
45 The second profile, neurochemically linked to excitation/inhibition balance, indicated the  
46 developmental refinement of motivational pathways, distinguishing resilient MDD-prone  
47 from psychologically vulnerable AD-prone teens. Its transcriptomic signature supported the  
48 posited role of MDD as an antecedent to AD. Our results unveil candidate neurobiological  
49 mechanisms supporting lifespan resilience against both psychiatric and neurological  
50 conditions linked to stress exposure.

51

52 Psychological Resilience in Adolescence as a function of Genetic Risk for Major

53 Depressive Disorder and Alzheimer's Disease

54

55 Adolescence is a critical developmental phase, marked by a multitude of interdependent

56 neurobiological and socio-environmental changes that are programmed to maximise

57 adjustment to one's milieu (1,2). Unsurprisingly, this is also the life stage in which more than

58 a third of all diagnosed mental disorders have their onset (3), a finding that underscores the

59 urgency in comprehensively characterising the developmental markers of subsequent

60 adaptation versus vulnerability (4, 5).

61 Alzheimer's Disease (AD) and Major Depressive Disorder (MDD) are two conditions

62 typified by altered brain maturation/ageing trajectories, in part stemming from systemic

63 inflammation processes (6-8). Robustly linked to greater stress susceptibility and exposure, as

64 well as genes regulating lifespan neurodevelopment, the two disorders have been posited to

65 share a causal connection, with MDD and broader predispositions towards experiencing

66 negative affect being regarded as risk factors or even early symptoms of AD (9-14).

67 Although the clinical onset of AD occurs mid- to late adulthood, compelling evidence

68 suggests that the preceding decades are marked by significant cellular changes linked to more

69 subtle cognitive-behavioural markers (15). Given that AD-relevant genetic risk factors are

70 under considerable environmental modulation (16), identification of early life

71 neurodevelopmental alterations among vulnerable individuals could be instrumental in

72 designing interventions to slow down or even prevent progression towards dementia.

73 Leveraging the purported relationships among stress, MDD and AD, we used a

74 longitudinal design to probe the overlap of the macroscale (functional connectomic) and

75 molecular (neurochemical and transcriptomic) brain correlates of psychological resilience

76 (i.e., positive adjustment to environmental challenges, [17, 18]) as a function of genetic risk  
77 for MDD versus AD. Overlapping substrates could unveil common pathways linking stress  
78 exposure to both AD and MDD, thereby justifying subsequent investigations into whether  
79 neurodevelopmental mechanisms that promote early life resilience may also foster resistance  
80 to AD in older adulthood.

81 Secondly, we sought to extend findings on the lifelong neurodevelopmental  
82 consequences of perinatal adversity exposure by characterising its potential risk-enhancing or  
83 protective (“inoculation”-like) role with regards to resilience, whether manifest directly or  
84 indirectly via an altered rate of biological ageing (i.e., pubertal timing) (cf. 19-25). Our  
85 complete model is depicted in Figure 1.

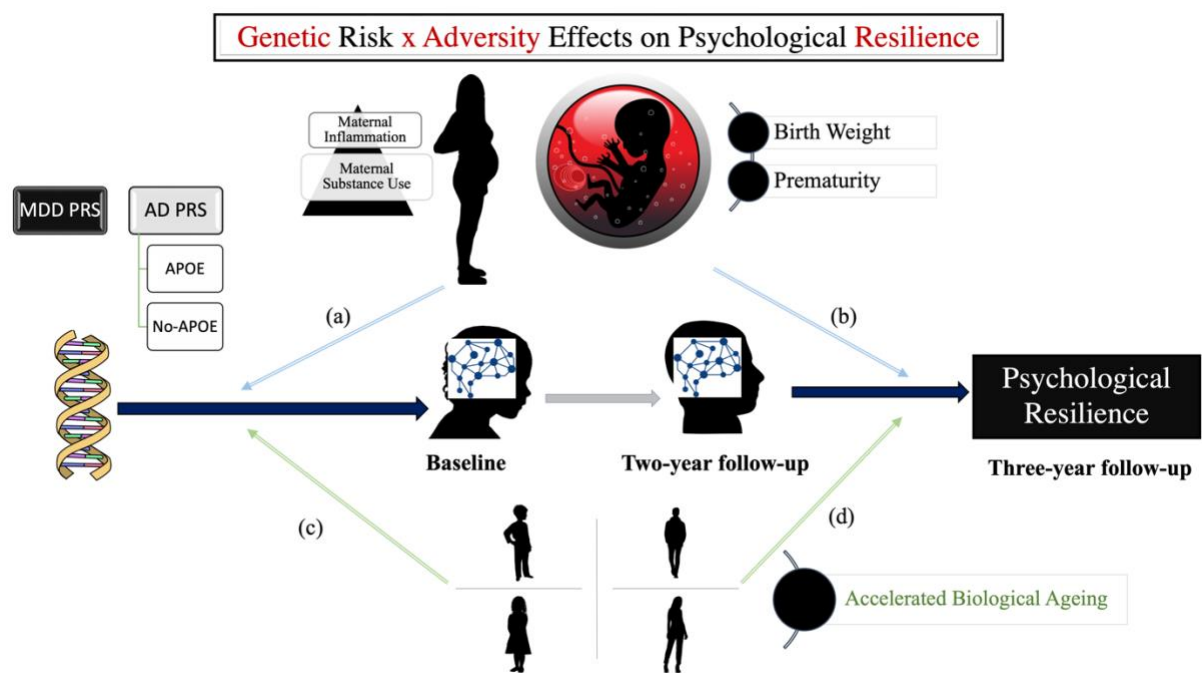

86  
87 *Figure 1.* Schematic representation of the conceptual/measurement model. Genetic risk for AD (APOE vs  
88 no-APOE-based, see Method for details) and MDD, respectively, were predicted to impact functional brain  
89 maturation, specifically, longitudinal fine-tuning and contemporaneous, cross-context differentiation, as  
90 observed on inhibitory control and incentive processing tasks. The primary goal was to identify  
91 neurodevelopmental patterns that would alleviate the expected negative impact of AD/MDD genetic risk  
92 on resilience. The moderating, potentially protective (“inoculation”-like effect) effects of perinatal

93 adversity and accelerated biological ageing on gene-brain (paths a, c) and brain-resilience (paths b, d) were  
94 also probed.

95

96 In light of its well-demonstrated utility in modelling trajectories of both normative brain  
97 maturation and (transdiagnostic) pathology, including AD, a network neuroscience approach  
98 was applied to longitudinal multimodal data from the Adolescent Brain and Cognitive  
99 Development (ABCD) study (26-28). Genetic vulnerability to AD and MDD, respectively,  
100 was quantified using polygenic risk scores (PRS, [29]) derived from genome-wide  
101 association studies (GWAS) (30-31). Developmental connectomic correlates of resilience  
102 were estimated in reference to two mental processes, inhibitory control and reward  
103 processing, which change substantially in adolescence, are highly susceptible to adversity and  
104 predictive of subsequent (psycho)pathology, including later life vulnerability to dementia  
105 (32-38). Molecular correlates of resilience were quantified using group-based normative  
106 maps of gene expression and receptor density focused on four neurotransmitters (dopamine  
107 [DA], serotonin [5-HT], glutamate [GLU], gamma-aminobutyric acid [GABA]) implicated in  
108 cognitive control, incentive processing, susceptibility to stress/resilience, as well as  
109 AD/MDD vulnerability, more specifically (39-49).

110

## Results

### 111 Mesoscale Functional Brain Correlates of Resilience and AD/MDD Risk

112 To characterise functional connectomic features linked to resilience, we applied a  
113 network-based clustering technique, referred to as “multilayer community detection” (50) to  
114 fMRI data collected during two tasks assessing inhibitory control and incentive processing,  
115 respectively (26). Using the Schaefer 300 parcel-functional atlas (51) and the “flexibility”  
116 function from the Network Community Toolbox (52), we estimated longitudinal (baseline-to-  
117 2-year follow-up) within-task and cross-task (inhibitory control/incentive processing)  
118 contemporaneous differences in functional brain architecture (i.e., changes in each parcel’s

119 functional community assignment [53]). The first index gauged fine-tuning of task-specific  
120 functional brain architecture. The second index reflected context-specificity in neural coding  
121 (i.e., inhibitory control-incentive processing differentiation), a cross-species marker of  
122 adaptive functioning and resilience (54-56). Partial least squares analysis (PLS) was  
123 subsequently applied to parcel-specific “flexibility” indices to identify connectomic features  
124 linked to resilience and/or genetic risk for AD/MDD.

125 PLS analysis 1 identified two latent variables (LVs,  $p$ -values of .0002 and .001,  
126 respectively), which accounted for 18.20% and 12.83%, respectively, of the brain-behaviour  
127 covariance. The first extracted LV related greater MDD risk, accelerated biological ageing  
128 and resilience to longitudinal increases in Control, somatomotor (SM), Salience/Ventral  
129 Attention (SAL/VAN), default mode (DMN) and visual (VIS) functional reconfiguration on  
130 the inhibitory control task (see Figure 2-a, b). The second LV linked VIS-related longitudinal  
131 and cross-task functional reorganisation at follow-up to higher resilience in the presence of  
132 stronger MDD, but weaker AD, risk (see Figure 3-a, b). Specifically, it implied that  
133 psychological health may hinge on refinement of VIS responses to incentives and rising task-  
134 specificity in processing.

135

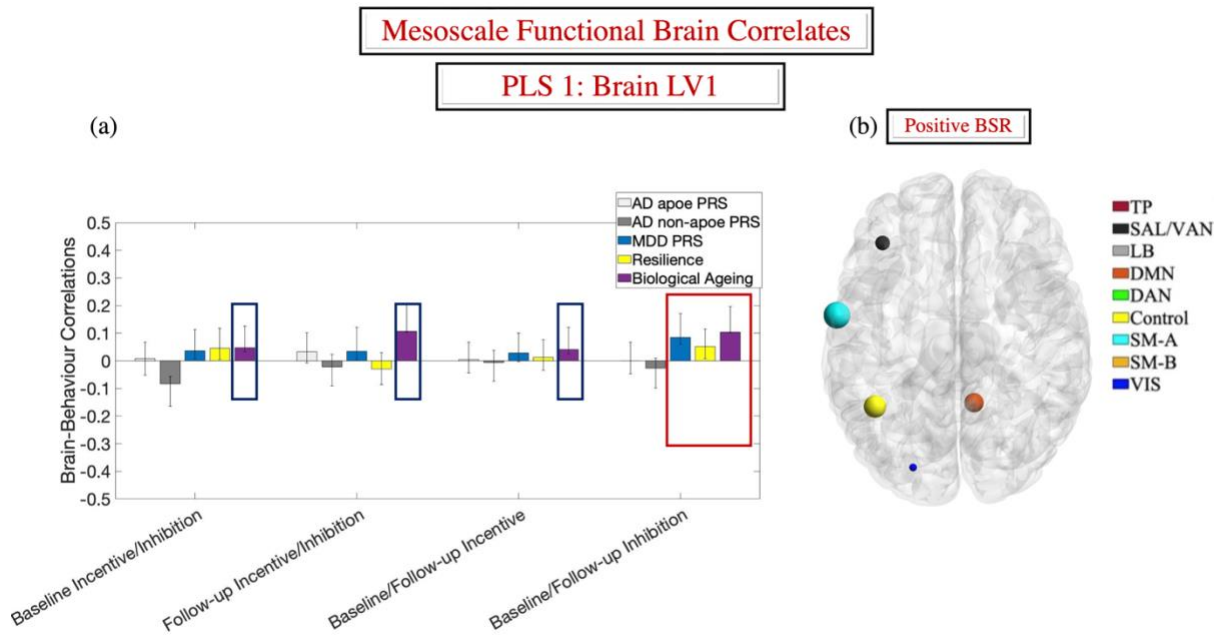

136

137 *Figure 2.* First extracted LV from the behavioral-PLS analysis linking AD/MDD genetic risk, resilience, and  
138 biological ageing to longitudinal and contemporaneous cross-context differentiation of the functional brain  
139 architecture relevant to incentive processing vs inhibitory control. Panel (a) shows the correlations between the  
140 behavioral variables and the brain scores in each condition. Panel (b) depicts the Schaefer parcels with robust  
141 loadings (absolute value BSR > 3) on the LV in panel (a) and visualized with the BrainNet Viewer  
142 (<http://www.nitrc.org/projects/bnv/>) (Xia et al., 2013). Parcel colours reflect Schaefer et al.'s network  
143 assignments. In panel (b), the size of the parcels is proportional to their associated absolute value BSR. Error  
144 bars are the 95% confidence intervals from the bootstrap procedure. Confidence intervals that do not include  
145 zero reflect robust correlations between the respective behavioral variable and the brain score in a given  
146 condition across all participants. In panel (a), hypothesis-relevant, significant brain-behavior correlations,  
147 replicated across all the supplemental analyses, are within red line rectangles. Significant brain-behavior  
148 correlations unrelated to our hypotheses are in blue rectangles. All the reported PLS analyses had been  
149 conducted on parcel-specific indices. Network labels attached to the parcels are included for informational  
150 purposes only. LV= latent variable. PRS = polygenic risk score. BSR = bootstrap ratio. Schaefer networks: TP=  
151 temporo-parietal. SAL-VAN = salience/ventral attention. LB = limbic. DMN = default mode. DAN = dorsal  
152 attention. SM-A =somatomotor-A. SM-B =somatomotor-B. VIS = visual.

153



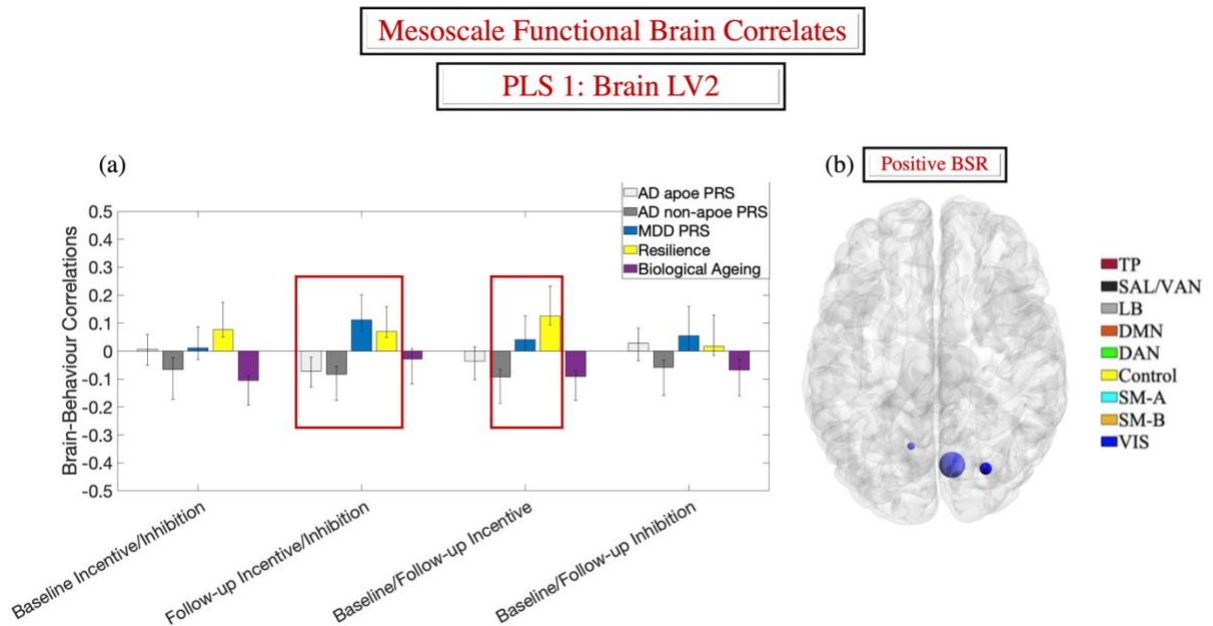

154

155 *Figure 3.* Second extracted LV from the behavioral-PLS analysis linking AD/MDD genetic risk, resilience, and  
156 biological ageing to longitudinal and contemporaneous cross-context differentiation of the functional brain  
157 architecture relevant to incentive processing vs inhibitory control. Panel (a) shows the correlations between the  
158 behavioral variables and the brain scores in each condition. Panel (b) depicts the Schaefer parcels with robust  
159 loadings (absolute value BSR > 3) on the LV in panel (a) and visualized with the BrainNet Viewer  
160 (<http://www.nitrc.org/projects/bnv/>) (Xia et al., 2013). Parcel colours reflect Schaefer et al.'s network  
161 assignments. In panel (b), the size of the parcels is proportional to their associated absolute value BSR. Error  
162 bars are the 95% confidence intervals from the bootstrap procedure. Confidence intervals that do not include  
163 zero reflect robust correlations between the respective behavioral variable and the brain score in a given  
164 condition across all participants. In panel (a), hypothesis-relevant, significant brain-behavior correlations  
165 replicated across all the supplemental analyses, are within red line rectangles. Significant brain-behavior  
166 correlations unrelated to our hypotheses are in blue rectangles. All the reported PLS analyses had been  
167 conducted on parcel-specific indices. Network labels attached to the parcels are included for informational  
168 purposes only. LV= latent variable. PRS = polygenic risk score. BSR = bootstrap ratio. Schaefer networks: TP=  
169 temporo-parietal. SAL-VAN = salience/ventral attention. LB = limbic. DMN = default mode. DAN = dorsal  
170 attention. SM-A =somatomotor-A. SM-B =somatomotor-B. VIS = visual.

171

172 The above PLS results were replicated with a distinct functional brain atlas (see  
173 Supplemental Materials). Exploratory PLS analyses conducted with males and females as  
174 two separate groups did not reveal any reliable sex differences with regards to the  
175 connectomic correlates of resilience or AD/MDD genetic vulnerability.

#### 176 **Microscale Correlates of Resilience and AD/MDD Risk**

177 To characterise the transcriptomic signature of the two brain LVs described above, we  
178 used the abagen toolbox (57) and quantified gene expression levels in each of the Schaefer  
179 parcels (see *Methods*). Two PLS analyses were subsequently conducted on the resilience-  
180 relevant brain LVs and the parcel x gene matrices outputted by the abagen toolbox.

181 **Gene-brain PLS 1: Left-hemisphere only.** The gene-brain PLS analysis identified a  
182 sole LV ( $p = .017$ ), which accounted for 70% of the brain-gene covariance. The extracted  
183 gene LV was positively correlated with both the brain LV1 (cf. Figure 2),  $r = .32$ , 95% CI =  
184 [.25; .45] and brain LV2 (cf. Figure 3),  $r = .48$ , 95% CI = [.40; .62].

185 **Gene-brain PLS 2: Bi-hemispheric.** The above brain-gene pattern was replicated  
186 using the bi-hemispheric gene expression data from the Schaefer atlas ( $p = .017$ , 63% brain-  
187 gene covariance explained; see Figure 4-a, b for the spatial expression profile of the gene  
188 LV). As expected, the identified gene LV was robustly related to both brain LVs (LV1:  $r =$   
189  $.30$ , 95% CI = [.24; .39]; LV2:  $r = .42$ , 95% CI = [.36; .51]).

190 **MDD-relevant gene expression profile.** To test whether the neural markers of  
191 genetic risk for AD are linked to greater expression of MDD-relevant genes in adolescence,  
192 consistent with MDD as a precursor to AD proposal, we used the expression quantitative trait  
193 locus (eQTL) analysis data from the MDD GWAS conducted by [31]. The MDD-relevant  
194 candidate risk loci had been mapped onto the corresponding genes by the original authors  
195 using the SNP2GENE tool in FUMA and made available via the Public Results tab  
196 (<https://fuma.ctglab.nl/browse>). Based on their eQTL analysis output, we identified 156

197 MDD-linked genes reliably expressed in our data. Of these, the risk allele(s) reduced gene  
198 expression for 76 of them (MDD\_low), but increased gene expression for the remaining 80  
199 (MDD\_high).

200 To characterise the transcriptomic signature of resilience and AD/MDD genetic risk,  
201 we focused on genes with an absolute value BSR of at least 4 (associated  $p$ -value  $< 10^{-4}$ ) in  
202 the brain-gene PLS analyses described above. Based on the brain-gene LV correlations,  
203 MDD-relevant transcriptomic associations with resilience, accelerated biological ageing and  
204 higher MDD PRS were derived from the number of MDD\_low genes with negative BSRs  
205 and MDD\_high genes with positive BSRs. Complementarily, the number of the MDD\_high  
206 genes with negative BSRs and MDD\_low genes with positive BSRs was used to test for an  
207 association between higher no-APOE-based AD PRS (see Figure 3-a) and stronger  
208 expression of the MDD-relevant gene expression profile.

209 No significant association was detected between the MDD-relevant gene expression  
210 and the resilience-linked brain LVs ( $p$ -values of .08 and .69 based on left hemisphere and bi-  
211 hemispheric data, respectively). In contrast, we found evidence of a significant relationship  
212 between the MDD-relevant transcriptomic profile and the neurodevelopmental profile yoked  
213 to no-APOE-based genetic risk for AD ( $p$ -values of .037 and .010 based on left hemisphere  
214 and bi-hemispheric data, respectively; for relative MDD gene contribution, see Figure 4-c, d).

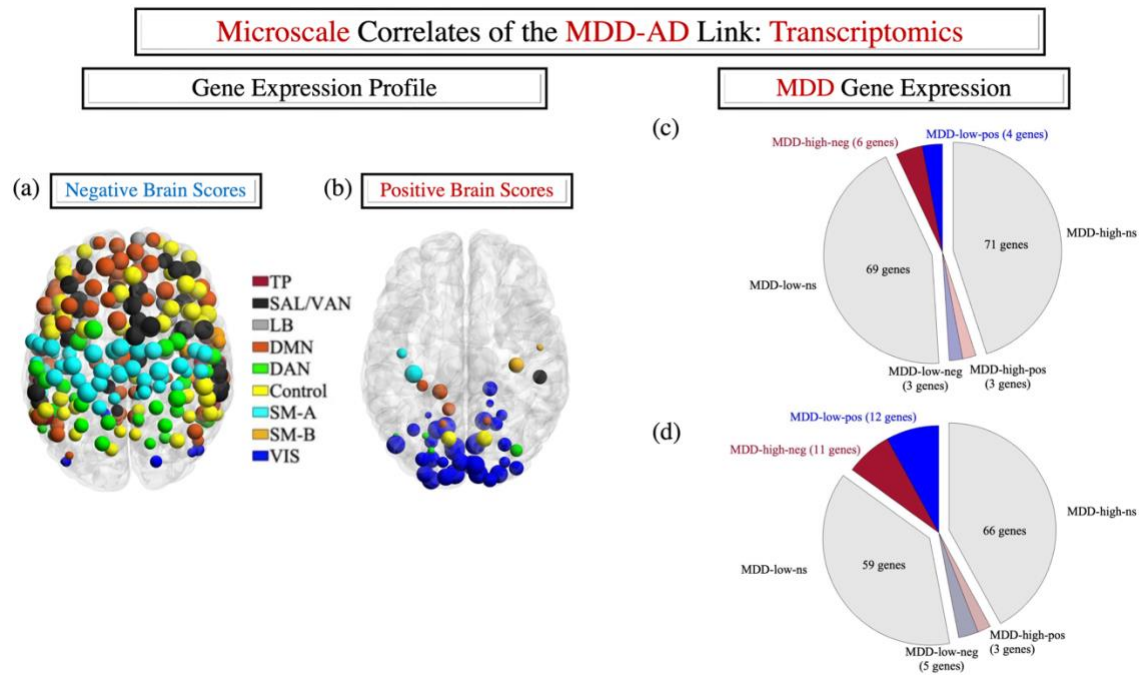

215

216 *Figure 4.* Transcriptomic correlates of the AD-MDD link. Panels (a) and (b) represent the spatial expression  
 217 map of the gene LV identified in the gene-brain behavioral PLS analysis. The parcels were visualized with the  
 218 BrainNet Viewer (<http://www.nitrc.org/projects/bnv/>) (Xia et al., 2013). Parcel colours reflect Schaefer et al.'s  
 219 network assignments and their size is proportional to how strongly they express the gene LV (i.e., the absolute  
 220 value of the associated brain score). Panels (c) and (d) depict the results of the MDD/no-APOE AD PRS overlap  
 221 analyses, using only left-hemisphere (c) or bi-hemispheric (d) data. As described in the text, these are based on  
 222 the gene LV depicted in panels (a) and (b), which was negatively correlated with the no-APOE PRS (see Figure  
 223 3-a). LV= latent variable. BSR = bootstrap ratio. Schaefer networks: TP= temporo-parietal. SAL-VAN =  
 224 salience/ventral attention. LB = limbic. DMN = default mode. DAN = dorsal attention. SM-A =somatomotor-A.  
 225 SM-B =somatomotor-B. VIS = visual.

226

227 **Receptor density maps.** To elucidate the overlap between our two resilience-relevant  
 228 brain profiles and density maps of neurotransmitters which play a substantial role in  
 229 psychopathology (GLU/GABA [E/I], DA [combined D1/D2], HT), we used the normative  
 230 group-based atlas provided by [58] and conducted a series of partial correlation analyses with  
 231 permutation-based significance testing featuring 100,000 spatially constrained null brain  
 232 maps [59]. We thus correlated each of the two brain LVs with each of the three density maps

233 controlling for the remaining maps (e.g., correlate brain LV1 with the combined D1/D2  
234 receptor density map, while controlling for HT, GABA and GLU receptor densities). We  
235 identified two significant correlations replicated with a second functional atlas (see  
236 Supplemental Materials). Specifically, brain LV1 demonstrated a significant association with  
237 the DA (combined D1/D2) receptor density map ( $r$  of .20, spin test  $p = .046$ ), while brain  
238 LV2 showed a significant negative correlation with the E/I density map ( $r$  of -.40, spin test  $p$   
239 = .002) (see Figure 5-a, d for the scatter plots describing these relationships and Figure 5-b, c,  
240 e for the E/I and DA receptor density maps).

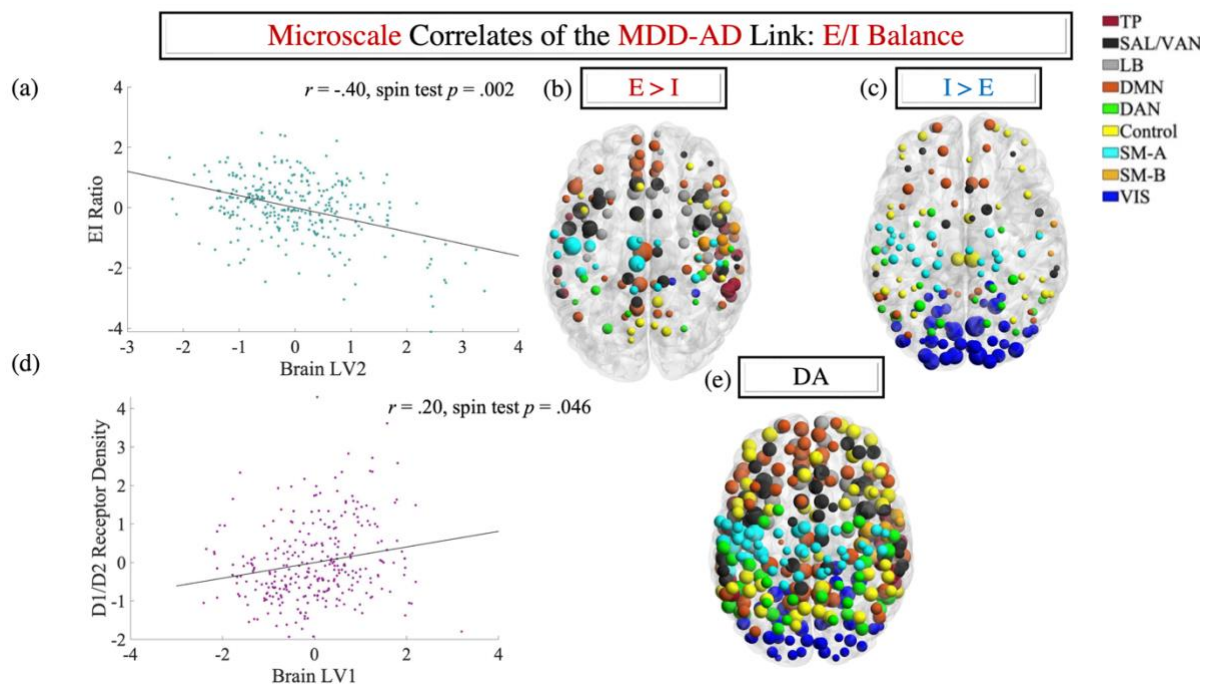

241  
242 *Figure 5.* Results of the correlational analyses linking the E/I and DA receptor density map to the two brain LVs  
243 relevant to AD/MDD genetic risk, resilience and biological ageing (see Figures 2 and 3). Panels (a) and (d)  
244 contain the scatter plots describing the linear relationship between brain LV2 and the E/I (GLU/GABA) density  
245 map (a), as well as between brain LV1 and the DA density map. Panels (b) and (c) represent the areas of E > I  
246 density and I > E density, respectively, whereas panel (e) depicts the DA receptor density map. The parcels were  
247 visualized with the BrainNet Viewer (<http://www.nitrc.org/projects/bnv/>) (Xia et al., 2013). Parcel colours  
248 reflect Schaefer et al.'s network assignments and their size is proportional to the density of the respective  
249 receptor. E/I = excitation/inhibition. GLU = glutamate. GABA = gamma-aminobutyric acid. DA = dopamine.

250

251 **Perinatal adversity and accelerated biological ageing as moderators of the AD/MDD**  
252 **genetic risk-resilience relationship**

253 Finally, we examined the role of perinatal adversity and accelerated biological ageing  
254 in modulating the impact of AD (no-APOE-based, see Figure 3-a) and/or MDD (see Figures  
255 2-, 3-a) genetic risk on psychological resilience at the three-year follow-up. To this end, we  
256 specified the two moderated parallel mediator models conceptually represented in Figure 1.  
257 The LV2 scores in the “Follow-up Incentive/Inhibition” and “Baseline/Follow-up Incentive”  
258 conditions were robustly correlated ( $r = .43, p < .001$ ). Consequently, in the absence of  
259 condition-specific predictions, the LV2 scores corresponding to the aforementioned  
260 conditions were standardised across participants and then averaged. The inhibition-linked  
261 LV1 (see Figure 2-a) and the averaged LV2 score were introduced as mediators. For the  
262 purpose of these analyses, the biological ageing variable was binned into “Low” (lowest 50%  
263 developing participants) and “High” (fastest 50% developing participants).

264 **Accelerated biological ageing strengthens the link between genetic risk for MDD**  
265 **and neurodevelopmental patterns predictive of subsequent resilience.** Of the two partial  
266 moderated mediation models tested, only one emerged as significant, with an index of .014,  
267  $SE = .008, 95\% CI [.002; .032]$ . Specifically, we found that brain LV1 scores were predicted  
268 by a robust MDD PRS x biological ageing interaction,  $b = .161, SE = .064, t(974) = 2.510, p$   
269  $= .012$  (see Figure 6-b), such that the link between the brain LV1 and MDD PRS was  
270 significant among the fastest developing participants, effect of .168,  $SE = .046, 95\% CI$   
271  $[.078; .257]$ . Accordingly, follow-up analyses confirmed that a significant mediation of MDD  
272 PRS effects on resilience via the brain LV1 was observed only for participants showing faster  
273 biological ageing, effect of .015,  $SE = .007, 95\% CI [.003; .030]$ .

274 **Simple mediation models.** Two follow-up parallel mediator models revealed that  
275 brain LV2 partially explained the indirect effect (IE) of no-APOE-based AD vulnerability on

276 reduced resilience,  $IE = -.016$ ,  $SE = .006$ , 95% CI  $[-.029; -.005]$  (see Figure 6-a), as well as  
277 the association between the MDD PRS and greater resilience,  $IE = .014$ ,  $SE = .006$ , 95% CI  
278  $[.004; .027]$  (see Figure 6-b).

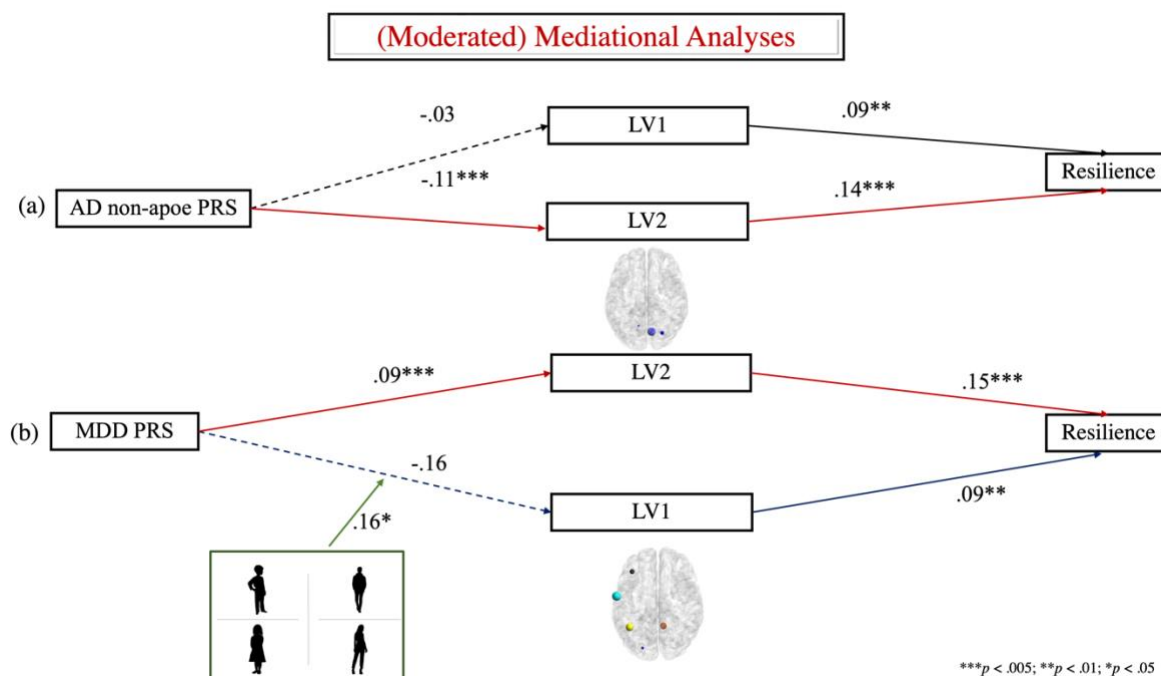

279  
280 *Figure 6.* (Moderated) mediational models linking genetic vulnerability to AD (panel a) and MDD (panel b),  
281 respectively to psychological resilience as assessed at the three-year follow-up. In both panels, the coefficients  
282 associated with the red paths had been derived from simple mediational analyses (as described in the text). The  
283 coefficients associated with the blue paths are based on the moderated mediation analyses. A dashed line  
284 indicates a statistically non-significant path ( $p > .05$ ).

285

286

## Discussion

287 Applying a multidimensional approach to longitudinal data from the ABCD study, we  
288 provide novel evidence of two neurodevelopmental profiles predictive of positive adjustment  
289 to environmental challenges as a function of genetic liability to AD/MDD. One profile  
290 reflected the brain mechanisms recruited by resilient adolescents who are at risk for MDD.  
291 Reinforcing the contribution of DA to both cognitive control and resilience (42, 47, 60), this  
292 profile captured the longitudinal fine-tuning of the inhibitory control architecture, spanning

293 areas of greater DA receptor density in functional systems that are trans-diagnostically  
294 involved in psychopathology (SAL, SM, DMN, Control, 36, 61, 62). Of note, the protective  
295 effects of this brain profile were strongest among the fastest maturing adolescents (i.e., those  
296 showing higher pubertal hormone levels), in line with prior demonstrations of DA-mediated  
297 gonadal hormone effects on behaviour, including liability to MDD (63-65). More broadly,  
298 this profile speaks to the value of longitudinal investigations of DA-gonadal hormone  
299 (particularly estradiol) dynamics in uncovering fluctuating substrates of resilience as a  
300 function of adversity exposure and differential gene expression patterns, including those  
301 observed across the various menstrual cycle stages (63, 66, 67).

302         A second neurodevelopmental profile differentiated resilient youth at genetic risk for  
303 MDD from psychologically vulnerable adolescents genetically predisposed towards AD.  
304 Longitudinal fine-tuning and cross-context differentiation of the neural architecture  
305 underpinning incentive processing emerged as a key resilience-promoting mechanism among  
306 the MDD-vulnerable youth. Conversely, network rigidity related to poorer resilience among  
307 AD-prone adolescents. Anchored in VIS areas of greater GABA, relative to GLU, receptor  
308 density, this profile reaffirmed the importance of externally oriented processing systems to  
309 MDD pathology (e.g., [68]), as well as the role of E/I balance in supporting functional  
310 network development (69). It also underscored the importance of conducting more targeted,  
311 neurotransmitter system-specific investigations into the relationships among AD/MDD risk,  
312 resilience and incentive processing. For instance, distinguishable GLU neuron populations in  
313 the ventral tegmental area (VTA) have been implicated in coding rewards and losses (70),  
314 while GABA and GLU neurons in the basal ganglia have been shown to code for rewards and  
315 threats, respectively (71, 72). Extending these findings, it would be worth establishing  
316 whether the observed E/I link to resilience in MDD- vs AD-predisposed individuals  
317 manifests through distinguishable pathways (e.g., threat/loss- vs reward-linked). Such a line



318 of inquiry would be well-served by studies targeting neurotransmitter-specific substrates of  
319 whole-brain functional network interactions, while accounting for age-related modulation  
320 (73), including effective connectivity patterns between subcortical and cortical regions. This  
321 work would further benefit from experimental manipulations targeting the variety of mental  
322 processes (e.g., positive emotion upregulation vs negative emotion downregulation, 74) and  
323 cells-to-networks neurobiological mechanisms underlying resilience as a function of stressor  
324 and genetic vulnerability.

325 Finally, we also found evidence compatible with the putative causal role of MDD in  
326 later AD onset (10, 13). Specifically, our results raised the possibility that lower resilience  
327 among adolescents at risk for AD may stem (partly) from poorer fine-tuning of the incentive  
328 processing architecture, linked to stronger expression of MDD-relevant risk genes. As our  
329 neurodevelopmental findings centered around VIS areas, implicated in episodic memory  
330 (re)construction processes (75, 76), they are well-aligned with recent proposals on the role of  
331 episodic memory in partially explaining the link between MDD and AD genetic risk (13).

332 Broadly, our present findings call for more fine-grained investigations of candidate  
333 neurobiological mechanisms underpinning the link between MDD and AD. Inflammatory  
334 processes linked to hypothalamic-pituitary-adrenal (HPA) axis dysregulation (10) would  
335 warrant special attention, particularly zooming in on alterations observed in astrocytes,  
336 microglia and mitochondria, given their susceptibility to stress, E/I modulation, as well as  
337 role in neurodegeneration and psychological resilience (77-82).

### 338 **Limitations and Future Directions**

339 Our present research opens several new avenues of inquiry. First, there is suggestive  
340 evidence that, compared to traditional laboratory tasks (such as those used in the ABCD  
341 study), naturalistic paradigms may yield neurocognitive patterns that better resemble those  
342 likely to be evoked in real-world settings (83). Consequently, replication and extension of our

343 findings in studies featuring a movie watching paradigm, for instance, could yield further  
344 insights into the results herein documented. Second, patterns of functional network  
345 interactions underpinning optimal adjustment have been shown to vary by domain (i.e.,  
346 cognition, personality, mental health) (84). As such, key insights could be gained by further  
347 probing our present findings on resilience through investigations on the neurodevelopmental  
348 mechanisms underpinning AD/MDD genetic risk and adaptive profile of cognition and/or  
349 personality.

350 Third, stronger genetic effects are reportedly observed on structural (relative to  
351 functional) brain indices, while structure-function coupling in connectomic features is also  
352 under substantial genetic modulation (85). Consequently, investigations of synchronised  
353 structure-function development would augment the findings herein reported, particularly  
354 given the robust predictive power of both white and gray matter indices for AD and MDD, as  
355 well as psychological resilience (86-88).

356 Fourth, while we provided suggestive evidence on the chemoarchitectural correlates  
357 of resilience, further cross-species investigations probing specific receptor types (e.g., D1 vs  
358 D2, 89), as well as interactions among multiple neurotransmitter systems (cf. 90) within an  
359 experimental paradigm would provide a finer grained dynamic representation of the  
360 multiscale interactions underpinning resilience. Fifth, the reliable sex differences observed in  
361 stress responses (91, 92), as well as in the genetic architecture underlying complex traits (93),  
362 highlight the need for cross-species comparative research to characterise sex-specific  
363 neurogenetic substrates of resilience, including compensatory mechanisms linked to  
364 AD/MDD vulnerability.

365 Finally, there is a strong need for further investigation of the mechanisms underlying  
366 the resilience-promoting effects of lifestyle choices (e.g., aerobic exercise, 94) and social  
367 relationships, including parental and peer presence in earlier life (95, 96). In particular, cross-

368 species studies of neuroplasticity-mediated increases in resilience (97) may play a key role in  
369 designing earlier life interventions to decelerate or annihilate progression towards dementia  
370 in older adulthood.

## 371 **Conclusions**

372 Distinguishable neurodevelopmental profiles, reflecting fine-tuning of the inhibitory  
373 control (accelerated biological ageing/DA-linked) vs incentive processing (E/I-related)  
374 architecture, predicted resilience among MDD-vulnerable adolescents. Promising support  
375 emerged for the proposed role of MDD as an early life precursor to AD, as poorer resilience  
376 among AD-vulnerable youth was associated with an MDD-relevant transcriptomic signature.

## 377 **Methods**

### 378 **Participants**

379 The sample included biological parents and offspring who participated in the ongoing  
380 Adolescent Brain Cognitive Development (ABCD) study. The analyses were based on data  
381 from Caucasian participants only because most polygenic risk markers to date have been  
382 based on this population and there is some evidence that genetic architecture and risk loci  
383 may show some racial differences (98, 99).

384 The present research uses baseline, two-, and three-year follow-up data downloaded  
385 in November 2021 as part of the ABCD Study Curated Annual Release 4.0 ([https://data-](https://data-archive.nimh.nih.gov/abcd)  
386 [archive.nimh.nih.gov/abcd](https://data-archive.nimh.nih.gov/abcd)). Following the recommendations of the ABCD study team (as  
387 detailed in the “abcd\_imgincl01” file included in the data release), 980 Caucasian participants  
388 (470 female), the majority of whom were predominantly right-handed (N = 814), were  
389 selected on the basis of being biologically unrelated and having contributed high-quality data  
390 on all measures of interest. At baseline, participants were aged 9-10 years (M = 119.97  
391 months, SD = 7.40 months). Follow-up sessions were similarly spaced across participants

392 (baseline to two-year follow-up:  $M = 23.93$  months,  $SD = 1.49$  months; two- to three-year  
393 follow-up:  $M = 11.20$  months,  $SD = 1.95$  months).

#### 394 **Psychological Resilience**

395 Participants' psychological resilience at the three-year follow-up was quantified by  
396 regressing out lifetime history of adverse experiences from the general psychopathology risk  
397 index (100, 101) multiplied by -1. Positive and negative residuals indicate greater and poorer  
398 resilience, respectively, relative to the sample mean (i.e., better- vs. worse-than-expected  
399 psychological functioning given experienced adversity).

#### 400 **Perinatal Adversity**

401 An index of perinatal adversity was extracted through principal components analysis  
402 from caregiver responses on the Developmental History Questionnaire (100), which was  
403 completed at baseline. This summary score, available in the ABCD 4.0 Data Release, reflects  
404 maternal prenatal care, maternal substance use during pregnancy, prenatal maternal health  
405 conditions, prematurity, birth complications and developmental milestones. The scores  
406 released by the ABCD team were multiplied by (-1), so that higher positive values would  
407 indicate greater perinatal adversity. For the purpose of our analyses, these transformed scores  
408 were subsequently binned into "Low" (lowest 50% values) and "High" (highest 50% values).

#### 409 **Biological Ageing: Pubertal Timing**

410 Parent ratings of pubertal development were selected as a measure of biological  
411 ageing due to their significant correlation with other indices of pubertal maturation. To create  
412 a more stable index of biological ageing, we averaged parent-rated pubertal development at  
413 baseline and the two-year follow-up ( $r$  of .65 [ $p < .001$ ], Cronbach's alphas of .62 and .83).  
414 While this approach to estimating biological ageing was favoured for psychometric reasons,  
415 we verified its convergence with measures of pubertal hormones, such as the  
416 dehydroepiandrosterone (DHEA), estradiol and testosterone among those participants who

417 had both types of measures. An index of accelerated pubertal development was computed by  
418 regressing from the averaged pubertal development score the youth's chronological age (see  
419 section on residualisation below for further details), such that a positive residual score  
420 indicated accelerated biological ageing.

#### 421 **Functional Brain Architecture**

422 Neurodevelopmental profiles relevant to inhibitory control and reward processing,  
423 respectively, were estimated during the in-scanner performance of a Stop Signal (SST) and  
424 monetary incentive delay (MID) task, respectively (26).

425 **MRI data acquisition and preprocessing.** Acquisition parameters and preprocessing  
426 steps for the ABCD study data are described in [102]. Our analyses used minimally  
427 preprocessed fMRI data available as part of the ABCD Study Curated Annual Release 4.0.  
428 The minimal preprocessing pipeline involved correction for head motion spatial and gradient  
429 distortions, bias field removal, and co-registration of the functional images to the  
430 participant's T1-weighted structural image. We further applied the following steps: (1)  
431 elimination of initial volumes (8 volumes [Siemens, Philips], 5 volumes [GE DV25], 16  
432 volumes [GE DV26] to allow the MR signal to reach steady state equilibrium, (2) linear  
433 regression-based removal of quadratic trends and 24 motion terms (i.e., the six motion  
434 parameters, their first derivatives, and squares, cf. 151) from each voxel's time course.

435 **Parcel definition.** Our main analyses were based on the Schaefer 300 parcel-  
436 functional atlas (51), downloaded from <https://github.com/ThomasYeoLab/CBIG>. The atlas  
437 version we used encompasses 17 functional networks, spanning core systems, such as the  
438 DMN (A/B/C), Control (A/B/C), Salience/Ventral Attention (A/B), Dorsal Attention (DAN  
439 A/B), Somatomotor (SM A/B), Visual (VIS Central/Peripheral), Limbic (LB A/B), and  
440 Temporo-parietal (TP). The Schaefer atlas was available in the Montreal Neurological  
441 Institute (MNI) standard space. To align it with the participants' native space for each of the

442 four tasks (SST at Time 1/Time 2, MID at Time 1/Time 2), the following steps were  
443 implemented in FSL: (1) the middle image in each task run was converted to the MNI space  
444 (via the MNI-152 brain template available in FSL) and the inverse transformation (MNI-to-  
445 participant native space) was estimated; (2) the inverse transformation was used to align the  
446 Schaefer atlas to each participant's functional images, separately for each task run (SST at  
447 Time 1/Time 2, MID at Time 1/Time 2).

448 **Parcel-to-parcel correlations in timeseries.** Pairwise Pearson's correlations between  
449 all the Schaefer parcels were computed separately for the SST and MID in Matlab and  
450 expressed as Fisher's z-transformed scores. Because the two tasks are very similar in  
451 duration, we used all available data from each. Similar to prior studies using multilayer  
452 community detection algorithms (e.g., 53), only the positive Fisher's z-scores were entered in  
453 the network-level analyses detailed below, while negative z-scores were set to zero.

454 **Network-level analyses.** All the network-level metrics were computed using the  
455 Network Community Toolbox (52), as described below. Patterns of parcel-based functional  
456 reorganisation, longitudinally within each task and between the two tasks at the same time  
457 point were characterised with a multilayer generalised Louvain-like community detection  
458 algorithm implemented in the NCT. In line with extant practices (53), the spatial resolution  
459 parameter was set to the default value of 1. Taking our cue from other investigations of  
460 heterogenous mental states (53), we set to 0.5 the cross-layer (MID-SST at Time 1; MID-SST  
461 at Time 2; Time 1-to-Time 2 MID; Time 1-to-Time 2 SST) connection strength parameter.  
462 To account for the near degeneracy of the modularity landscape, the multilayer community  
463 detection algorithm was initiated 100 times and all the functional network interactions indices  
464 detailed below were averaged across all iterations.

465 **Functional network development.** Longitudinal (baseline-to-2-year follow-up)  
466 within-task and cross-task (SST/MID) contemporaneous differences in functional brain

467 architecture were estimated across all the modularity optimisation iterations. Specifically,  
468 using the “flexibility” function in NCT, we quantified the number of times each parcel in the  
469 Schaefer atlas changed communities between the two tasks at each wave and, within each  
470 task, from baseline to follow-up.

#### 471 **Polygenic Risk Scores (PRS)**

472 MDD and AD PRSs were each computed as the weighted sum of risk alleles based on  
473 the summary statistics of two large GWASs focused on each disorder (30, 31, for AD and  
474 MDD, respectively). We focused on these two GWASs for the following reasons: (1) public  
475 availability of eQTL analysis output; (2) match to our Caucasian-only sample with [31] in  
476 particular, being the largest MDD GWAS to date of this population; (3) use of clinical  
477 diagnosis-based patient cases and, for [30] confirmed clinical cases of late-onset sporadic  
478 AD, which would ease the interpretation of the derived PRSs and associated findings.

479 For AD, we computed a separate APOE region (chromosome 19:44.4-46.5 Mb)- vs  
480 no-APOE region PRS because the two PRSs forecast distinguishable trajectories of  
481 neurocognitive impairments and differential susceptibility to environmental factors (16). For  
482 MDD, we used the the top 10k most informative variants, based on approximately 76k  
483 patients and 230k controls, which had been made publicly available by [31]. These variants  
484 had been obtained by clumping the corresponding GWAS statistics with the following  
485 parameters  $p1 = p2 = 1$ , window size  $< 500\text{kb}$ , and  $r^2 > 0.1$ .

486 Prior to PRS computation, the following preprocessing steps were implemented: (1)  
487 genes with a minor allele frequency (MAF)  $< .05$ , insertion/deletion and ambiguous single  
488 nucleotide polymorphisms (SNPs) (i.e., A/T and G/C pairs) were excluded; (2) highly  
489 correlated SNPs ( $r^2 > .10$ ) within a 500 kb window were eliminated. The SNPs which  
490 survived the preprocessing and had an associated GWAS level  $p \leq 5 \times 10^{-8}$  contributed to the  
491 computation of the disorder-specific PRSs (MDD PRS:  $N = 8$  SNPs; no-APOE AD PRS:  $N =$

492 10 SNPs; APOE AD PRS = 14 SNPs). In our main analyses we opted to use a stringent  $p$ -  
493 value (i.e., GWAS-level significant at  $p < .05$ ) in order to identify the variants contributing  
494 most robustly to predicting genetic risk for AD/MDD. However, in supplemental analyses,  
495 we confirmed that the identified brain patterns linked to AD/MDD risk and resilience also  
496 emerged when using more lenient  $p$ -thresholds (see Figures S3-6).

#### 497 **Gene expression data processing and analysis**

498 **Microarray gene expression.** Micro-array gene expression data were obtained from  
499 six postmortem brains (1 female, ages 24.0–57.0, 42.50 +/- 13.38) provided by the Allen  
500 Institute for Brain Science (<https://www.brain-map.org/>). Because all six brains had left  
501 hemisphere data, but only two brains contained data from the right hemisphere, our gene-  
502 brain analyses focused on the left hemisphere parcels. However, consistent with observations  
503 that gene expression patterns are largely symmetric across the two hemispheres, we provide  
504 evidence that our results are replicated when using gene expression patterns mirrored across  
505 the two hemispheres.

506 The gene expression data was processed with abagen  
507 (<https://github.com/netneurolab/abagen>), following the steps outlined in [57]. The resulting  
508 gene expression matrices, used in all our analyses, were in the format 297 (bilateral)/147  
509 (left-hemisphere) (parcels) x 15,632 (genes). A list of parcels lacking reliable gene  
510 expression is included in the Supplemental Materials (Table S1).

511 **MDD overlap tests.** To test whether the neural markers of genetic risk for AD are  
512 linked to greater expression of MDD-relevant genes in adolescence, consistent with MDD as  
513 a precursor to AD proposal, we used the eQTL analysis data from the MDD GWAS  
514 conducted by [31]. The MDD-relevant candidate risk loci had been mapped onto the  
515 corresponding genes by the original authors using the SNP2GENE tool in FUMA and made  
516 available via the Public Results tab (<https://fuma.ctglab.nl/browse>). Based on their eQTL



517 analysis output, we identified 156 MDD-linked genes reliably expressed in our data. Of  
518 these, the risk allele(s) reduced gene expression for 76 of them (MDD\_low), but increased  
519 gene expression for the remaining 80 (MDD\_high).

520 To characterise the transcriptomic signature of resilience and AD/MDD genetic risk,  
521 we focused on genes with an absolute value BSR of at least 4 (associated p-value  $< 10^{-4}$ ) in  
522 the brain-gene PLS analyses. Comparisons were conducted separately for genes with positive  
523 versus negative loadings on the gene LV. As an example, for the positive BSR genes, the  
524 procedure was as follows: (1) we obtained separate counts of the number of MDD\_low and  
525 MDD\_high genes, respectively, with a BSR of at least 4 on our gene LV (MDD\_low\_pos and  
526 MDD\_high\_pos, respectively); (2) we counted the number of genes with a BSR of at least 4  
527 on our gene LV (Orig\_pos); (3) from each of the corresponding gene LVs in the null  
528 distribution (each of which had been aligned with the original gene LVs via a Procrustes  
529 transform), we selected a number of genes equal to Orig\_pos (Null\_pos); (4) we counted the  
530 number of null samples (out of the total of 100,000) in which the number of either  
531 MDD\_low\_pos or MDD\_high\_pos in Null\_Pos exceeded the one observed in Orig\_pos. The  
532 same procedure was followed for the negative BSR genes. Estimation of whether the  
533 identified transcriptomic signatures implied greater risk for MDD varied depending on  
534 whether the brain and gene were positively versus negatively correlated. For example, if the  
535 gene and brain LVs were positively correlated, MDD risk would be estimated as a  
536 conjunction of MDD\_low genes with negative BSRs and MDD\_high genes with positive  
537 BSRs observed in the original data relative to the null distribution.

538 ***Control analyses: AD-relevant transcriptomic signature.*** The very low number (=4)  
539 of AD risk genes in the thresholded (BSR  $> 4$ ) left-hemispheric gene data prevented us from  
540 running any control analyses relevant to the transcriptomic signature of AD. For the analyses

541 using bi-hemispheric data, we found no evidence of a statistically significant link between the  
542 AD-relevant transcriptomic profile and either of the two identified brain LVs ( $ps > .07$ ).

### 543 **Receptor Density Maps: DA, GABA, GLU, HT**

544 To estimate receptor density maps for our neurotransmitters of interest (DA, GABA,  
545 GLU, HT), we used the normative atlas put together by [58], which is based on positron  
546 emission tomography (PET) data from over 1200 healthy individuals. Group-averaged pre-  
547 processed PET images corresponding to each tracer map for DA, GABA, GLU, HT were  
548 downloaded from  
549 [https://github.com/netneurolab/hansen\\_receptors/tree/main/data/PET\\_nifti\\_images](https://github.com/netneurolab/hansen_receptors/tree/main/data/PET_nifti_images). Each  
550 tracer map was parcellated in the MNI-152 space based on the Schaefer atlas using the  
551 “Parcellater” function from neuromaps  
552 <https://github.com/netneurolab/neuromaps/tree/main/neuromaps>. Following the strategy from  
553 [58], an adapted version of the “make\_receptor\_matrix.py” script  
554 ([https://github.com/netneurolab/hansen\\_receptors/tree/main/code](https://github.com/netneurolab/hansen_receptors/tree/main/code)) was employed to estimate  
555 the weighted average of the receptor density maps corresponding to each neurotransmitter of  
556 interest. This was done separately for each tracer based on the number of participants in the  
557 respective study (see Table 1 in [58]).

558 Each receptor density measure was standardised across all the parcels in the Schaefer  
559 atlas. The multiple indices of DA and HT receptor density were moderately to strongly  
560 correlated (DA [D1/D2]:  $r$  of .52; HT:  $r$ s from .28 to .57). Consequently, a global index of  
561 DA (combined D1/D2) and HT, respectively, receptor density was computed by averaging  
562 the standardised scores of the corresponding indices. A parcel-specific E/I measure was  
563 created by subtracting the GABA receptor density standardised score from the GLU receptor  
564 density standardised score. Brain regions with higher values on this index show relatively  
565 greater GLU (compared to GABA) receptor density.

566 **Control Variables**

567 To characterise the underpinnings of resilience in relation to the total number of acute  
568 stressful experiences, we controlled for chronic exposure to material deprivation, family  
569 conflict and neighbourhood crime, all of which had been shown to impact inhibitory control,  
570 incentive processing and susceptibility to psychopathology.

571 **Residualisation**

572 The non-imaging variables were residualised for the following confounders:

- 573 (1) chronological age in order to estimate accelerated/decelerated development;  
574 (1) biological sex (coded as “1” for females, “0” for males);  
575 (2) handedness (coded as “0” for right-handedness and “1” for non-right-handedness);  
576 (3) serious medical problems, which was based on the ABCD Parent Medical History  
577 Questionnaire and computed as an average of unplanned hospital visits in the prior year for  
578 chronic health conditions, head trauma, loss of consciousness and/or convulsions/trauma;  
579 (4) scanner site (21 dummy variables to account for scanner-related differences, as well as  
580 broad differences in family education and socio-economic status across sites);  
581 (5) material deprivation, family conflict and neighbourhood crime;  
582 (6) average modality-specific motion per participant (151);  
583 (7) difference (in months) between the baseline and two-year follow-up sessions (only for the  
584 non-imaging variables involved in longitudinal comparisons).

585 Because the difficulty of the MID and SST trials was dynamically adjusted to  
586 maintain a set accuracy level (26), we saw no reason to control for behavioural performance.

587 **Data reduction: Multivariate normality.** Because the multiple linear regression  
588 analyses used for confounder residualisation are sensitive to violations of multivariate  
589 normality, a square-root transformation was applied to the Total Problem scores (which  
590 contributes to the psychological resilience index) and the APOE-based AD PRS scores prior

591 to any analyses. Subsequently, an examination of the PRSs, resilience and accelerated  
592 biological aging residuals based on the normal Q-Q plots and the Kolmogorov-Smirnov test  
593 (with the Lilliefors significance correction) confirmed the multivariate normality of all non-  
594 imaging variables under scrutiny.

#### 595 **fMRI and PRS Data Analysis**

596 **Partial least squares analysis (PLS).** Partial least squares correlation (i.e., PLS), a  
597 multivariate data-driven manner technique which can identify relationships between neural  
598 patterns (latent variables or LVs) and individual differences variables (behavioural PLS), was  
599 used to probe the transcriptomic and functional brain profiles linked to AD/MDD-related  
600 genetic vulnerability, psychological resilience and accelerated biological ageing.

601 Two sets of behavioural PLS analyses were conducted. The sole analysis in the first set  
602 featured resilience, biological ageing, as well as the MDD and AD (APOE- vs non-APOE-  
603 based) PRSs in the “behavioural” matrix. The brain matrix contained the flexibility indices  
604 estimated in NCT and modelled as four separate conditions reflecting functional brain  
605 reorganisation, longitudinally within each task (incentive vs inhibitory control), as well as  
606 between the two tasks at baseline and the two-year follow-up, respectively. The second set of  
607 PLS analyses sought to characterise the transcriptomic signature of resilience, biological  
608 ageing and AD/MDD genetic vulnerability. Specifically, it estimated the correlation between  
609 the brain LVs identified in behavioural PLS analysis 1 and the parcel x gene expression level  
610 matrix derived with the abagen toolbox from the comprehensive transcriptomic maps  
611 provided by the Allen Brain Institute.

612 **Significance and reliability testing.** In all the reported PLS analyses, the significance  
613 of each LV was determined using a permutation test (5000 permutations for the brain-  
614 [behavior] analyses and 100,000 permutations for all the analyses involving gene expression  
615 data). In the gene-brain PLS analysis, to account for correlated gene expression patterns

616 based on anatomical proximity we used Vasa’s “rotate\_parcellation” function in Matlab  
617 ([https://github.com/frantisekvasa/rotate\\_parcellation/commit/bb8b0ef10980f162793cc180cef](https://github.com/frantisekvasa/rotate_parcellation/commit/bb8b0ef10980f162793cc180cef371e83655c505)  
618 [371e83655c505](https://github.com/frantisekvasa/rotate_parcellation/commit/bb8b0ef10980f162793cc180cef371e83655c505)) in order to generate 100,000 spatially constrained permutations of the  
619 Schaefer brain LV, as identified in behavioral PLS analysis 1. These spatially constrained  
620 permuted brain LVs were used to assess the significance of the extracted gene LVs.

621 The reliability of each parcel’s contribution to a particular LV was tested by  
622 submitting all weights to a bootstrap estimation (1000 bootstraps for the brain-[behaviour]  
623 analyses and 100000 bootstraps for all the analyses involving gene expression data) of the  
624 standard errors (SEs) A bootstrap ratio (BSR) (weight/SE) of at least 3 in absolute value  
625 (approximate associated  $p$ -value  $< .005$ ) was used as a threshold for identifying those parcels  
626 that made a significant contribution to the identified LVs. For the gene PLS analyses, we  
627 focused on approximately the top 10% of absolute value BSRs (i.e.,  $\sim 4$ , associated  $p$ -value  $<$   
628  $10^{-4}$ ).

629 **Mediation analyses.** To test whether perinatal adversity and/or accelerated biological  
630 ageing modulate the neurodevelopmental correlates of resilience as a function of genetic risk  
631 for AD and MDD, we conducted two moderated mediation analyses using Hayes’ PROCESS  
632 3.5 macro for SPSS. These analyses were based on the PLS results and, as such, for AD, they  
633 only involved the no-APOE-based PRS. Two simple mediation analyses involving the same  
634 predictors, mediators and outcome were also performed for exploratory purposes.

635 **Acknowledgments.** Data used in the preparation of this article were obtained from the  
636 Adolescent Brain Cognitive Development (ABCD) Study (<https://abcdstudy.org>), held in the  
637 NIMH Data Archive (NDA). This is a multisite, longitudinal study designed to recruit more  
638 than 10,000 children age 9-10 and follow them over 10 years into early adulthood. The  
639 ABCD Study is supported by the National Institutes of Health and additional federal partners  
640 under award numbers U01DA041048, U01DA050989, U01DA051016, U01DA041022,  
641 U01DA051018, U01DA051037, U01DA050987, U01DA041174, U01DA041106,  
642 U01DA041117, U01DA041028, U01DA041134, U01DA050988, U01DA051039,  
643 U01DA041156, U01DA041025, U01DA041120, U01DA051038, U01DA041148,  
644 U01DA041093, U01DA041089, U24DA041123, U24DA041147. A full list of supporters is  
645 available at <https://abcdstudy.org/federal-partners.html>. A listing of participating  
646 sites and a complete listing of the study investigators can be found at  
647 [https://abcdstudy.org/consortium\\_members/](https://abcdstudy.org/consortium_members/). ABCD consortium investigators designed and  
648 implemented the study and/or provided data but did not participate in analysis or writing of  
649 this report. This manuscript reflects the views of the authors and may not reflect the opinions  
650 or views of the NIH or ABCD consortium investigators. The authors would like to thank  
651 Valentina Escott-Price for advice on the polygenic risk analyses.

652 **Materials & Correspondence.** Correspondence and material requests should be addressed to  
653 R.P. ([petricanr@cardiff.ac.uk](mailto:petricanr@cardiff.ac.uk)).

654 **Data statement.** The raw data are available at <https://nda.nih.gov/abcd> upon completion of  
655 the relevant data use agreements. The ABCD data repository grows and changes over time.  
656 The ABCD data used in this report came from Adolescent Brain Cognitive Development  
657 Study (ABCD) - Annual Release 4.0 #1299. DOIs can be found at  
658 <http://dx.doi.org/10.15154/1523041>

659 **Code availability.** We used already existing code, as specified in the main text with links for

660 free download.

661

662

## References

663

- 664 1. Alvarez-Dominguez, J. R., & Melton, D. A. (2022). Cell maturation: Hallmarks,  
665 triggers, and manipulation. *Cell*, *185*, 235–249.
- 666 2. Lopez, M., Ruiz, M. O., Rovnaghi, C. R., Tam, G. K., Hiscox, J., Gotlib, I. H., Barr, D.  
667 A., Carrion, V. G., & Anand, K. (2021). The social ecology of childhood and early life  
668 adversity. *Pediatric Research*, *89*, 353–367.
- 669 3. Solmi, M., Radua, J., Olivola, M., Croce, E., Soardo, L., Salazar de Pablo, G., Il Shin,  
670 J., Kirkbride, J. B., Jones, P., Kim, J. H., Kim, J. Y., Carvalho, A. F., Seeman, M. V.,  
671 Correll, C. U., & Fusar-Poli, P. (2022). Age at onset of mental disorders worldwide:  
672 large-scale meta-analysis of 192 epidemiological studies. *Molecular Psychiatry*, *27*,  
673 281–295.
- 674 4. Akarca, D., Vértes, P. E., Bullmore, E. T., CALM team, & Astle, D. E. (2021). A  
675 generative network model of neurodevelopmental diversity in structural brain  
676 organization. *Nature Communications*, *12*, 4216.
- 677 5. Tozzi, L., Staveland, B., Holt-Gosselin, B., Chesnut, M., Chang, S.E., Choi, D., Shiner,  
678 M.L., Wu, H., Lerma-Usabiaga, G., Sporns, O., Barch, D., Gotlib, I.H., Hastie, T.J.,  
679 Kerr, A.B., Poldrack, R.A., Wandell, B.A., Wintermark, M., & Williams, L.M. (2020).  
680 The human connectome project for disordered emotional states: Protocol and rationale  
681 for a research domain criteria study of brain connectivity in young adult anxiety and  
682 depression. *NeuroImage*, *124*, 116715.
- 683 6. Bach, A. M., Xie, W., Piazzoli, L., Jensen, S., Afreen, S., Haque, R., Petri, W. A., &  
684 Nelson, C. A. (2022). Systemic inflammation during the first year of life is associated  
685 with brain functional connectivity and future cognitive outcomes. *Developmental*  
686 *Cognitive Neuroscience*, *53*, 101041.



- 687 7. Toenders, Y. J., Laskaris, L., Davey, C. G., Berk, M., Milaneschi, Y., Lamers, F.,  
688 Penninx, B., & Schmaal, L. (2022). Inflammation and depression in young people: a  
689 systematic review and proposed inflammatory pathways. *Molecular Psychiatry*, 27,  
690 315–327.
- 691 8. Guerrero, A., De Strooper, B., & Arancibia-Cárcamo, I. L. (2021). Cellular senescence  
692 at the crossroads of inflammation and Alzheimer's disease. *Trends in Neurosciences*,  
693 S0166-2236(21)00119-3. Advance online publication.  
694 <https://doi.org/10.1016/j.tins.2021.06.007>
- 695 9. Brouwer, R. M., Klein, M., Grasby, K. L., Schnack, H. G., Jahanshad, N., Teeuw, J.,  
696 Thomopoulos, S. I., Sprooten, E., Franz, C. E., Gogtay, N., Kremen, W. S., Panizzon,  
697 M. S., Olde Loohuis, L. M., Whelan, C. D., Aghajani, M., Alloza, C., Alnæs, D.,  
698 Artiges, E., Ayesa-Arriola, R., Barker, G. J., ... Hulshoff Pol, H. E. (2022). Genetic  
699 variants associated with longitudinal changes in brain structure across the lifespan.  
700 *Nature Neuroscience*, 25, 421–432.
- 701 10. Dafsari, F.S. & Jessen, F. (2020) Depression—an underrecognized target for prevention  
702 of dementia in Alzheimer’s disease. *Translational Psychiatry*, 10, 160.
- 703 11. Lutz, M. W., Luo, S., Williamson, D. E., & Chiba-Falek, O. (2020). Shared genetic  
704 etiology underlying late-onset Alzheimer's disease and posttraumatic stress syndrome.  
705 *Alzheimer's & Dementia : The journal of the Alzheimer's Association*, 16, 1280–1292.
- 706 12. De Jager, C. H., White, C. C., Bennett, D. A., & Ma, Y. (2021). Neuroticism alters the  
707 transcriptome of the frontal cortex to contribute to the cognitive decline and onset of  
708 Alzheimer's disease. *Translational Psychiatry*, 11, 139.
- 709 13. Harerimana, N. V., Liu, Y., Gerasimov, E. S., Duong, D., Beach, T. G., Reiman, E. M.,  
710 Schneider, J. A., Boyle, P., Lori, A., Bennett, D. A., Lah, J. J., Levey, A. I., Seyfried, N.

- 711 T., Wingo, T. S., & Wingo, A. P. (2022). Genetic Evidence Supporting a Causal Role of  
712 Depression in Alzheimer's Disease. *Biological Psychiatry*, *92*, 25–33.
- 713 14. Ho, T. C., & King, L. S. (2021). Mechanisms of neuroplasticity linking early adversity  
714 to depression: developmental considerations. *Translational Psychiatry*, *11*, 517.
- 715 15. De Strooper, B., & Karran, E. (2016). The Cellular Phase of Alzheimer's Disease. *Cell*,  
716 *164*, 603–615.
- 717 16. Frisoni, G. B., Altomare, D., Thal, D. R., Ribaldi, F., van der Kant, R., Ossenkoppele,  
718 R., Blennow, K., Cummings, J., van Duijn, C., Nilsson, P. M., Dietrich, P. Y.,  
719 Scheltens, P., & Dubois, B. (2022). The probabilistic model of Alzheimer disease: the  
720 amyloid hypothesis revised. *Nature Reviews. Neuroscience*, *23*, 53–66.
- 721 17. Kalisch, R., Cramer, A., Binder, H., Fritz, J., Leertouwer, I., Lunansky, G., Meyer, B.,  
722 Timmer, J., Veer, I. M., & van Harmelen, A. L. (2019). Deconstructing and  
723 Reconstructing Resilience: A Dynamic Network Approach. *Perspectives on*  
724 *Psychological Science*, *14*, 765–777.
- 725 18. Gee, D. G. (2021). Early Adversity and Development: Parsing Heterogeneity and  
726 Identifying Pathways of Risk and Resilience. *The American Journal of Psychiatry*, *178*,  
727 998–1013.
- 728 19. Coley, E., & Hsiao, E. Y. (2021). Malnutrition and the microbiome as modifiers of early  
729 neurodevelopment. *Trends in Neurosciences*, *44*, 753–764.
- 730 20. Krontira, A. C., Cruceanu, C., & Binder, E. B. (2020). Glucocorticoids as Mediators of  
731 Adverse Outcomes of Prenatal Stress. *Trends in Neurosciences*, *43*, 394–405.
- 732 21. Mareckova, K., Marecek, R., Andryskova, L., Brazdil, M., & Nikolova, Y. S. (2020).  
733 Maternal Depressive Symptoms During Pregnancy and Brain Age in Young Adult  
734 Offspring: Findings from a Prenatal Birth Cohort. *Cerebral Cortex*, *30*, 3991–3999.

- 735 22. Merhar, S. L., Jiang, W., Parikh, N. A., Yin, W., Zhou, Z., Tkach, J. A., Wang, L.,  
736 Kline-Fath, B. M., He, L., Braimah, A., Vannest, J., & Lin, W. (2021). Effects of  
737 prenatal opioid exposure on functional networks in infancy. *Developmental Cognitive*  
738 *Neuroscience*, 51, 100996.
- 739 23. Stephen, J. M., Hill, D. E., & Candelaria-Cook, F. T. (2021). Examining the effects of  
740 prenatal alcohol exposure on corticothalamic connectivity: A multimodal neuroimaging  
741 study in children. *Developmental Cognitive Neuroscience*, 52, 101019.
- 742 24. Thomason, M. E., Palopoli, A. C., Jariwala, N. N., Werchan, D. M., Chen, A., Adhikari,  
743 S., Espinoza-Heredia, C., Brito, N. H., & Trentacosta, C. J. (2021). Miswiring the brain:  
744 Human prenatal  $\Delta 9$ -tetrahydrocannabinol use associated with altered fetal hippocampal  
745 brain network connectivity. *Developmental Cognitive Neuroscience*, 51, 101000.
- 746 25. Zutshi, I., Gupta, S., Zanoletti, O., Sandi, C., & Poirier, G. L. (2021). Early life adoption  
747 shows rearing environment supersedes transgenerational effects of paternal stress on  
748 aggressive temperament in the offspring. *Translational Psychiatry*, 11, 533.
- 749 26. Casey, B. J., Cannonier, T., Conley, M. I., Cohen, A. O., Barch, D. M., Heitzeg, M. M.,  
750 Soules, M. E., Teslovich, T., Dellarco, D. V., Garavan, H., Orr, C. A., Wager, T. D.,  
751 Banich, M. T., Speer, N. K., Sutherland, M. T., Riedel, M. C., Dick, A. S., Bjork, J. M.,  
752 Thomas, K. M., Charani, B., ... ABCD Imaging Acquisition Workgroup (2018). The  
753 Adolescent Brain Cognitive Development (ABCD) study: Imaging acquisition across 21  
754 sites. *Developmental Cognitive Neuroscience*, 32, 43–54.
- 755 27. Fornito, A., Zalesky, A., Breakspear, M. J. (2015). The connectomics of brain disorders.  
756 *Nature Reviews Neuroscience*, 16, 159-172.
- 757 28. Váša, F., Romero-Garcia, R., Kitzbichler, M. G., Seidlitz, J., Whitaker, K. J., Vaghi, M.  
758 M., Kundu, P., Patel, A. X., Fonagy, P., Dolan, R. J., Jones, P. B., Goodyer, I. M.,  
759 NSPN Consortium, Vértes, P. E., & Bullmore, E. T. (2020). Conservative and disruptive

- 760 modes of adolescent change in human brain functional connectivity. *Proceedings of the*  
761 *National Academy of Sciences of the United States of America*, 117, 3248–3253.
- 762 29. Young, A. I., Benonisdotir, S., Przeworski, M., & Kong, A. (2019). Deconstructing the  
763 sources of genotype-phenotype associations in humans. *Science*, 365, 1396–1400.
- 764 30. Kunkle, B. W., Grenier-Boley, B., Sims, R., Bis, J. C., Damotte, V., Naj, A. C et al.  
765 (2019). Genetic meta-analysis of diagnosed Alzheimer's disease identifies new risk loci  
766 and implicates A $\beta$ , tau, immunity and lipid processing. *Nature genetics*, 51, 414–430.
- 767 31. Howard, D. M., Adams, M. J., Clarke, T. K., Hafferty, J. D., Gibson, J., Shirali, M. et al.  
768 (2019). Genome-wide meta-analysis of depression identifies 102 independent variants  
769 and highlights the importance of the prefrontal brain regions. *Nature neuroscience*, 22,  
770 343–352.
- 771 32. Cao, Z., Ottino-Gonzalez, J., Cupertino, R. B., Juliano, A., Chaarani, B., Banaschewski,  
772 T., Bokde, A., Quinlan, E. B., Desrivières, S., Flor, H., Grigis, A., Gowland, P., Heinz,  
773 A., Brühl, R., Martinot, J. L., Martinot, M. P., Artiges, E., Nees, F., Orfanos, D. P.,  
774 Paus, T., ... IMAGEN consorciu (2021). Characterizing reward system neural  
775 trajectories from adolescence to young adulthood. *Developmental Cognitive*  
776 *Neuroscience*, 52, 101042.
- 777 33. Constantinidis, C., & Luna, B. (2019). Neural Substrates of Inhibitory Control  
778 Maturation in Adolescence. *Trends in Neurosciences*, 42, 604–616.
- 779 34. Jenkins, L. M., Kogan, A., Malinab, M., Ingo, C., Sedaghat, S., Bryan, N. R., Yaffe, K.,  
780 Parrish, T. B., Nemeth, A. J., Lloyd-Jones, D. M., Launer, L. J., Wang, L., & Sorond, F.  
781 (2021). Blood pressure, executive function, and network connectivity in middle-aged  
782 adults at risk of dementia in late life. *Proceedings of the National Academy of Sciences*  
783 *of the United States of America*, 118, e2024265118.

- 784 35. Lloyd, A., McKay, R. T., & Furl, N. (2022). Individuals with adverse childhood  
785 experiences explore less and underweight reward feedback. *Proceedings of the National*  
786 *Academy of Sciences of the United States of America*, 119, e2109373119.
- 787 36. McTeague, L.M., Huemer, J., Carreon, D.M., Jiang, Y., Eickhoff, S.B., & Etkin A.  
788 (2017) Identification of common neural circuit disruptions in cognitive control across  
789 psychiatric disorders. *American Journal of Psychiatry*, 174, 676-685.
- 790 37. Ng, T. H., Alloy, L. B., & Smith, D. V. (2019). Meta-analysis of reward processing in  
791 major depressive disorder reveals distinct abnormalities within the reward circuit.  
792 *Translational Psychiatry*, 9, 293.
- 793 38. Roeckner, A. R., Oliver, K. I., Lebois, L., van Rooij, S., & Stevens, J. S. (2021). Neural  
794 contributors to trauma resilience: a review of longitudinal neuroimaging studies.  
795 *Translational Psychiatry*, 11, 508.
- 796 39. DiSabato, D. J., Nemeth, D. P., Liu, X., Witcher, K. G., O'Neil, S. M., Oliver, B., Bray,  
797 C. E., Sheridan, J. F., Godbout, J. P., & Quan, N. (2021). Interleukin-1 receptor on  
798 hippocampal neurons drives social withdrawal and cognitive deficits after chronic social  
799 stress. *Molecular Psychiatry*, 26, 4770–4782.
- 800 40. Englund, J., Haikonen, J., Shteinikov, V., Amarilla, S. P., Atanasova, T., Shintyapina,  
801 A., Ryazantseva, M., Partanen, J., Voikar, V., & Lauri, S. E. (2021). Downregulation of  
802 kainate receptors regulating GABAergic transmission in amygdala after early life stress  
803 is associated with anxiety-like behavior in rodents. *Translational Psychiatry*, 11, 538.
- 804 41. Fogaça, M. V., Wu, M., Li, C., Li, X. Y., Picciotto, M. R., & Duman, R. S. (2021).  
805 Inhibition of GABA interneurons in the mPFC is sufficient and necessary for rapid  
806 antidepressant responses. *Molecular Psychiatry*, 26, 3277–3291.
- 807 42. Fox, M. E., & Lobo, M. K. (2019). The molecular and cellular mechanisms of  
808 depression: a focus on reward circuitry. *Molecular Psychiatry*, 24, 1798–1815.

- 809 43. Joffe, M. E., Maksymetz, J., Luschinger, J. R., Dogra, S., Ferranti, A. S., Luessen, D. J.,  
810 Gallinger, I. M., Xiang, Z., Branthwaite, H., Melugin, P. R., Williford, K. M., Centanni,  
811 S. W., Shields, B. C., Lindsley, C. W., Calipari, E. S., Siciliano, C. A., Niswender, C.  
812 M., Tadross, M. R., Winder, D. G., & Conn, P. J. (2022). Acute restraint stress redirects  
813 prefrontal cortex circuit function through mGlu5 receptor plasticity on somatostatin-  
814 expressing interneurons. *Neuron*, S0896-6273(21)01044-8.
- 815 44. Karalija, N., Köhncke, Y., Düzel, S., Bertram, L., Papenberg, G., Demuth, I., Lill, C.  
816 M., Johansson, J., Riklund, K., Lövdén, M., Bäckman, L., Nyberg, L., Lindenberger, U.,  
817 & Brandmaier, A. M. (2021). A common polymorphism in the dopamine transporter  
818 gene predicts working memory performance and in vivo dopamine integrity in aging.  
819 *NeuroImage*, 245, 118707.
- 820 45. Kim J., Kang S., Choi T.-Y., Chang K.-A & Koo J.W. (2022) Metabotropic glutamate  
821 receptor 5 in amygdala target neurons regulates susceptibility to chronic social stress,  
822 *Biological Psychiatry*, doi: <https://doi.org/10.1016/j.biopsych.2022.01.006>.
- 823 46. Svensson, J. E., Svanborg, C., Plavén-Sigraý, P., Kaldo, V., Halldin, C., Schain, M., &  
824 Lundberg, J. (2021). Serotonin transporter availability increases in patients recovering  
825 from a depressive episode. *Translational Psychiatry*, 11, 264.
- 826 47. Westbrook, A., Frank, M. J., & Cools, R. (2021). A mosaic of cost-benefit control over  
827 cortico-striatal circuitry. *Trends in Cognitive Sciences*, 25, 710–721.
- 828 48. Yan, Z., & Rein, B. (2022). Mechanisms of synaptic transmission dysregulation in the  
829 prefrontal cortex: pathophysiological implications. *Molecular Psychiatry*, 27, 445–465.
- 830 49. Zhong, P., Cao, Q., & Yan, Z. (2022). Selective impairment of circuits between  
831 prefrontal cortex glutamatergic neurons and basal forebrain cholinergic neurons in a  
832 tauopathy mouse model. *Cerebral Cortex*, bhac036. Advance online publication.  
833 <https://doi.org/10.1093/cercor/bhac036>

- 834 50. Mucha, P. J., Richardson, T., Macon, K., Porter, M. A., & Onnela, J. P. (2010).  
835 Community structure in time-dependent, multiscale, and multiplex  
836 networks. *Science*, *328*, 876–878.
- 837 51. Schaefer, A., Kong, R., Gordon, E. M., Laumann, T. O., Zuo, X. N., Holmes, A. J.,  
838 Eickhoff, S. B., & Yeo, B. (2018). Local-Global Parcellation of the Human Cerebral  
839 Cortex from Intrinsic Functional Connectivity MRI. *Cerebral Cortex*, *28*, 3095–3114.
- 840 52. Bassett, D.S. [2017, November]. Network Community Toolbox. Retrieved from  
841 <http://commdetect.weebly.com/>
- 842 53. Finc, K., Bonna, K., He, X., Lydon-Staley, D. M., Kühn, S., Duch, W., & Bassett, D. S.  
843 (2020). Dynamic reconfiguration of functional brain networks during working memory  
844 training. *Nature Communications*, *11*, 2435.
- 845 54. Nougaret, S., Baunez, C., & Ravel, S. (2022). Neurons in the monkey's subthalamic  
846 nucleus differentially encode motivation and effort. *The Journal of Neuroscience*, JN-  
847 RM-0281-21. Advance online publication. [https://doi.org/10.1523/JNEUROSCI.0281-](https://doi.org/10.1523/JNEUROSCI.0281-21.2021)  
848 [21.2021](https://doi.org/10.1523/JNEUROSCI.0281-21.2021)
- 849 55. Petrican, R., & Grady, C. L. (2017). Contextual and Developmental Differences in the  
850 Neural Architecture of Cognitive Control. *The Journal of Neuroscience*, *37*, 7711–7726.
- 851 56. Reineberg, A. E., Banich, M. T., Wager, T. D., & Friedman, N. P. (2022). Context-  
852 specific activations are a hallmark of the neural basis of individual differences in  
853 general executive function. *NeuroImage*, *249*, 118845.
- 854 57. Markello, R. D., Arnatkeviciute, A., Poline, J. B., Fulcher, B. D., Fornito, A., & Misić,  
855 B. (2021). Standardizing workflows in imaging transcriptomics with the abagen  
856 toolbox. *eLife*, *10*, e72129.
- 857 58. Hansen, JY, Shafiei G, Markello, RD, Smart, K, Cox, SML, Wu, Y, Gallezot, J-D,  
858 Aumont, E, Servaes, S, Scala, SG, DuBois, JM, Wainstein, G, Bezgin, G, Funck, T,

- 859 Schmitz, TW, Spreng, RN, Soucy, J-P, Baillet, S, Guimond, S, Hietala, J, Bédard, M-A,  
860 Leyton, M, Kobayashi, E, Rosa-Neto, P, Palomero-Gallagher, N, Shine, JM, Carson,  
861 RE, Tuominen, L, Dagher A, & Misic B (2021). Mapping neurotransmitter systems to  
862 the structural and functional organization of the human neocortex. *Biorxiv*.  
863 doi:10.1101/2021.10.28.466336.
- 864 59. Arnatkeviciute, A., Fulcher, B. D., Bellgrove, M. A., & Fornito, A. (2021). Where the  
865 genome meets the connectome: Understanding how genes shape human brain  
866 connectivity. *NeuroImage*, 244, 118570.
- 867 60. Qi, G., Zhang, P., Li, T., Li, M., Zhang, Q., He, F., Zhang, L., Cai, H., Lv, X., Qiao, H.,  
868 Chen, X., Ming, J., & Tian, B. (2022). NAc-VTA circuit underlies emotional stress-  
869 induced anxiety-like behavior in the three-chamber vicarious social defeat stress mouse  
870 model. *Nature Communications*, 13, 577.
- 871 61. Javaheripour, N., Li, M., Chand, T., Krug, A., Kircher, T., Dannlowski, U., Nenadić, I.,  
872 Hamilton, J. P., Sacchet, M. D., Gotlib, I. H., Walter, H., Frodl, T., Grimm, S., Harrison,  
873 B. J., Wolf, C. R., Olbrich, S., van Wingen, G., Pezawas, L., Parker, G., Hyett, M. P., ...  
874 Wagner, G. (2021). Altered resting-state functional connectome in major depressive  
875 disorder: a mega-analysis from the PsyMRI consortium. *Translational Psychiatry*, 11,  
876 511.
- 877 62. Kebets, V., Holmes, A. J., Orban, C., Tang, S., Li, J., Sun, N., Kong, R., Poldrack, R.  
878 A., & Yeo, B. (2019). Somatosensory-motor dysconnectivity spans multiple  
879 transdiagnostic dimensions of psychopathology. *Biological Psychiatry*, 86, 779–791.
- 880 63. Eck, S. R., & Bangasser, D. A. (2020). The effects of early life stress on motivated  
881 behaviors: A role for gonadal hormones. *Neuroscience and Biobehavioral Reviews*, 119,  
882 86–100.



- 883 64. Jacobs, E. G., & Goldstein, J. M. (2018). The Middle-Aged Brain: Biological sex and  
884 sex hormones shape memory circuitry. *Current Opinion in Behavioral Sciences*, 23, 84-  
885 91.
- 886 65. Peper, J. S., & Dahl, R. E. (2013). Surging Hormones: Brain-Behavior Interactions  
887 During Puberty. *Current Directions in Psychological Science*, 22, 134–139.
- 888 66. Knoedler, J. R., Inoue, S., Bayless, D. W., Yang, T., Tantry, A., Davis, C. H., Leung, N.  
889 Y., Parthasarathy, S., Wang, G., Alvarado, M., Rizvi, A. H., Fenno, L. E.,  
890 Ramakrishnan, C., Deisseroth, K., & Shah, N. M. (2022). A functional cellular  
891 framework for sex and estrous cycle-dependent gene expression and behavior. *Cell*, 185,  
892 654–671.e22.
- 893 67. Mueller, J. M., Pritschet, L., Santander, T., Taylor, C. M., Grafton, S. T., Jacobs, E. G.,  
894 & Carlson, J. M. (2021). Dynamic community detection reveals transient reorganization  
895 of functional brain networks across a female menstrual cycle. *Network Neuroscience*, 5,  
896 125–144.
- 897 68. Ray, D., Bezmaternykh, D., Mel'nikov, M., Friston, K. J., & Das, M. (2021). Altered  
898 effective connectivity in sensorimotor cortices is a signature of severity and clinical  
899 course in depression. *Proceedings of the National Academy of Sciences of the United*  
900 *States of America*, 118, e2105730118.
- 901 69. Kalemaki, K., Velli, A., Christodoulou, O., Denaxa, M., Karagogeos, D., &  
902 Sidiropoulou, K. (2021). The Developmental Changes in Intrinsic and Synaptic  
903 Properties of Prefrontal Neurons Enhance Local Network Activity from the Second to  
904 the Third Postnatal Weeks in Mice. *Cerebral Cortex*, bhab438. Advance online  
905 publication. <https://doi.org/10.1093/cercor/bhab438>

- 906 70. McGovern, D. J., Polter, A. M., & Root, D. H. (2021). Neurochemical Signaling of  
907 Reward and Aversion to Ventral Tegmental Area Glutamate Neurons. *The Journal of*  
908 *Neuroscience*, *41*, 5471–5486.
- 909 71. Al-Hasani, R., Gowrishankar, R., Schmitz, G. P., Pedersen, C. E., Marcus, D. J.,  
910 Shirley, S. E., Hobbs, T. E., Elerding, A. J., Renaud, S. J., Jing, M., Li, Y., Alvarez, V.  
911 A., Lemos, J. C., & Bruchas, M. R. (2021). Ventral tegmental area GABAergic  
912 inhibition of cholinergic interneurons in the ventral nucleus accumbens shell promotes  
913 reward reinforcement. *Nature Neuroscience*, *24*, 1414–1428.
- 914 72. Stephenson-Jones, M., Bravo-Rivera, C., Ahrens, S., Furlan, A., Xiao, X., Fernandes-  
915 Henriques, C., & Li, B. (2020). Opposing Contributions of GABAergic and  
916 Glutamatergic Ventral Pallidal Neurons to Motivational Behaviors. *Neuron*, *105*, 921–  
917 933.e5.
- 918 73. Ferrara, N. C., Trask, S., Avonts, B., Loh, M. K., Padival, M., & Rosenkranz, J. A.  
919 (2021). Developmental Shifts in Amygdala Activity during a High Social Drive State.  
920 *The Journal of Neuroscience*, *41*, 9308–9325.
- 921 74. Min, J., Nashiro, K., Yoo, H. J., Cho, C., Nasser, P., Bachman, S. L., Porat, S., Thayer,  
922 J. F., Chang, C., Lee, T. H., & Mather, M. (2022). Emotion Downregulation Targets  
923 Interoceptive Brain Regions While Emotion Upregulation Targets Other Affective Brain  
924 Regions. *The Journal of Neuroscience*, *42*, 2973–2985.
- 925 75. Daselaar, S. M., Rice, H. J., Greenberg, D. L., Cabeza, R., LaBar, K. S., & Rubin, D. C.  
926 (2008). The spatiotemporal dynamics of autobiographical memory: neural correlates of  
927 recall, emotional intensity, and reliving. *Cerebral Cortex*, *18*, 217–229.
- 928 76. Huijbers, W., Pennartz, C. M., Rubin, D. C., & Daselaar, S. M. (2011). Imagery and  
929 retrieval of auditory and visual information: neural correlates of successful and  
930 unsuccessful performance. *Neuropsychologia*, *49*, 1730–1740.

- 931 77. Bellenguez, C., Küçükali, F., Jansen, I. E., Klei, L., Moreno-Grau, S., Amin, N.,  
932 Naj, A. C., Campos-Martin, R., Grenier-Boley, B., Andrade, V., Holmans, P. A.,  
933 Boland, A., Damotte, V., van der Lee, S. J., Costa, M. R., Kuulasmaa, T., Yang, Q., de  
934 Rojas, I., Bis, J. C., Yaqub, A., ... Lambert, J. C. (2022). New insights into the genetic  
935 etiology of Alzheimer's disease and related dementias. *Nature Genetics*, *54*, 412–436.
- 936 78. Brivio, P., Audano, M., Gallo, M. T., Gruca, P., Lason, M., Litwa, E., Fumagalli, F.,  
937 Papp, M., Mitro, N., & Calabrese, F. (2022). Metabolomic signature and mitochondrial  
938 dynamics outline the difference between vulnerability and resilience to chronic stress.  
939 *Translational Psychiatry*, *12*, 87.
- 940 79. Cathomas, F., Holt, L. M., Parise, E. M., Liu, J., Murrough, J. W., Casaccia, P., Nestler,  
941 E. J., & Russo, S. J. (2022). Beyond the neuron: Role of non-neuronal cells in stress  
942 disorders. *Neuron*, S0896-6273(22)00102-7. Advance online publication.  
943 <https://doi.org/10.1016/j.neuron.2022.01.033>
- 944 80. Cheng, X. T., Huang, N., & Sheng, Z. H. (2022). Programming axonal mitochondrial  
945 maintenance and bioenergetics in neurodegeneration and regeneration. *Neuron*, S0896-  
946 6273(22)00251-3. Advance online publication.  
947 <https://doi.org/10.1016/j.neuron.2022.03.015>
- 948 81. Mederos, S., Sánchez-Puelles, C., Esparza, J., Valero, M., Ponomarenko, A., & Perea,  
949 G. (2021). GABAergic signaling to astrocytes in the prefrontal cortex sustains goal-  
950 directed behaviors. *Nature Neuroscience*, *24*, 82–92.
- 951 82. Wightman, D. P., Jansen, I. E., Savage, J. E., Shadrin, A. A., Bahrami, S., Holland, D.,  
952 Rongve, A., Børte, S., Winsvold, B. S., Drange, O. K., Martinsen, A. E., Skogholt, A.  
953 H., Willer, C., Bråthen, G., Bosnes, I., Nielsen, J. B., Fritsche, L. G., Thomas, L. F.,  
954 Pedersen, L. M., Gabrielsen, M. E., ... Posthuma, D. (2021). A genome-wide

- 955 association study with 1,126,563 individuals identifies new risk loci for Alzheimer's  
956 disease. *Nature Genetics*, 53, 1276–1282.
- 957 83. Gal, S., Coldham, Y., Tik, N., Bernstein-Eliav, M., & Tavor, I. (2022) Act natural:  
958 Functional connectivity from naturalistic stimuli fMRI outperforms resting-state in  
959 predicting brain activity. *NeuroImage*, doi:  
960 <https://doi.org/10.1016/j.neuroimage.2022.119359>
- 961 84. Chen, J., Tam, A., Kebets, V., Orban, C., Ooi, L., Asplund, C. L., Marek, S.,  
962 Dosenbach, N., Eickhoff, S. B., Bzdok, D., Holmes, A. J., & Yeo, B. (2022). Shared and  
963 unique brain network features predict cognitive, personality, and mental health scores in  
964 the ABCD study. *Nature Communications*, 13, 2217.
- 965 85. Gu, Z., Jamison, K. W., Sabuncu, M. R., & Kuceyeski, A. (2021). Heritability and  
966 interindividual variability of regional structure-function coupling. *Nature*  
967 *Communications*, 12, 4894.
- 968 86. Huang, H., Zheng, S., Yang, Z., Wu, Y., Li, Y., Qiu, J., Cheng, Y., Lin, P., Lin, Y.,  
969 Guan, J., Mikulis, D. J., Zhou, T., & Wu, R. (2022). Voxel-based morphometry and a  
970 deep learning model for the diagnosis of early Alzheimer's disease based on cerebral  
971 gray matter changes. *Cerebral Cortex*, bhac099. Advance online publication.  
972 <https://doi.org/10.1093/cercor/bhac099>
- 973 87. Lu, F., Cui, Q., Chen, Y., He, Z., Sheng, W., Tang, Q., Yang, Y., Luo, W., Yu, Y.,  
974 Chen, J., Li, D., Deng, J., Zeng, Y., & Chen, H. (2022). Insular-associated causal  
975 network of structural covariance evaluating progressive gray matter changes in major  
976 depressive disorder. *Cerebral Cortex*, bhac105. Advance online publication.  
977 <https://doi.org/10.1093/cercor/bhac105>
- 978 88. Zhao, B., Zhang, J., Ibrahim, J. G., Luo, T., Santelli, R. C., Li, Y., Li, T., Shan, Y., Zhu,  
979 Z., Zhou, F., Liao, H., Nichols, T. E., & Zhu, H. (2021). Large-scale GWAS reveals

- 980 genetic architecture of brain white matter microstructure and genetic overlap with  
981 cognitive and mental health traits (n = 17,706). *Molecular Psychiatry*, 26, 3943–3955.
- 982 89. Simpson, E. H., Gallo, E. F., Balsam, P. D., Javitch, J. A., & Kellendonk, C. (2022).  
983 How changes in dopamine D2 receptor levels alter striatal circuit function and  
984 motivation. *Molecular Psychiatry*, 27, 436–444.
- 985 90. Mei, J., Muller, E., & Ramaswamy, S. (2022). Informing deep neural networks by  
986 multiscale principles of neuromodulatory systems. *Trends in Neurosciences*, 45, 237–  
987 250.
- 988 91. Caradonna, S. G., Einhorn, N. R., Saudagar, V., Khalil, H., Petty, G. H., Lihagen, A.,  
989 LeFloch, C., Lee, F. S., Akil, H., Guidotti, A., McEwen, B. S., Gatta, E., & Marrocco, J.  
990 (2022). Corticosterone induces discrete epigenetic signatures in the dorsal and ventral  
991 hippocampus that depend upon sex and genotype: focus on methylated Nr3c1 gene.  
992 *Translational Psychiatry*, 12, 109.
- 993 92. Kuhn, L., Noack, H., Wagels, L., Prothmann, A., Schulik, A., Aydin, E., Nieratschker,  
994 V., Derntl, B., & Habel, U. (2022). Sex-dependent multimodal response profiles to  
995 psychosocial stress. *Cerebral Cortex*, bhac086. Advance online publication.  
996 <https://doi.org/10.1093/cercor/bhac086>
- 997 93. Bernabeu, E., Canela-Xandri, O., Rawlik, K., Talenti, A., Prendergast, J., & Tenesa, A.  
998 (2021). Sex differences in genetic architecture in the UK Biobank. *Nature Genetics*, 53,  
999 1283–1289.
- 1000 94. Ludyga, S., Gerber, M., & Kamijo, K. (2022). Exercise types and working memory  
1001 components during development. *Trends in Cognitive Sciences*, 26, 191–203.
- 1002 95. Rogers, C. R., Chen, X., Kwon, S. J., McElwain, N. L., & Telzer, E. H. (2022). The role  
1003 of early attachment and parental presence in adolescent behavioural and neurobiological  
1004 regulation. *Developmental Cognitive Neuroscience*, 53, 101046.

- 1005 96. Willoughby, T., Heffer, T., van Noordt, S., Desjardins, J., Segalowitz, S., & Schmidt, L.  
1006 (2021). An ERP investigation of children and adolescents' sensitivity to wins and losses  
1007 during a peer observation manipulation. *Developmental Cognitive Neuroscience, 51*,  
1008 100995.
- 1009 97. Nosjean, A., & Granon, S. (2021). Brain Adaptation to Acute Stress: Effect of Time,  
1010 Social Buffering, and Nicotinic Cholinergic System. *Cerebral Cortex*, bhab461.  
1011 Advance online publication. <https://doi.org/10.1093/cercor/bhab461>
- 1012 98. Abdellaoui, A., & Verweij, K. (2021). Dissecting polygenic signals from genome-wide  
1013 association studies on human behaviour. *Nature Human Behaviour, 5*, 686–694.
- 1014 99. Wojcik, G. L., Graff, M., Nishimura, K. K., Tao, R., Haessler, J., Gignoux, C. R.,  
1015 Highland, H. M., Patel, Y. M., Sorokin, E. P., Avery, C. L., Belbin, G. M., Bien, S. A.,  
1016 Cheng, I., Cullina, S., Hodonsky, C. J., Hu, Y., Huckins, L. M., Jeff, J., Justice, A. E.,  
1017 Kocarnik, J. M., ... Carlson, C. S. (2019). Genetic analyses of diverse populations  
1018 improves discovery for complex traits. *Nature, 570*, 514–518.
- 1019 100. Barch, D. M., Albaugh, M. D., Baskin-Sommers, A., Bryant, B. E., Clark, D. B.,  
1020 Dick, A. S., Feczko, E., Foxe, J. J., Gee, D. G., Giedd, J., Glantz, M. D., Hudziak, J. J.,  
1021 Karcher, N. R., LeBlanc, K., Maddox, M., McGlade, E. C., Mulford, C., Nagel, B. J.,  
1022 Neigh, G., Palmer, C. E., ... Xie, L. (2021). Demographic and mental health  
1023 assessments in the adolescent brain and cognitive development study: Updates and age-  
1024 related trajectories. *Developmental Cognitive Neuroscience, 52*, 101031.
- 1025 101. Barch, D. M., Albaugh, M. D., Avenevoli, S., Chang, L., Clark, D. B., Glantz, M. D.,  
1026 Hudziak, J. J., Jernigan, T. L., Tapert, S. F., Yurgelun-Todd, D., Alia-Klein, N., Potter,  
1027 A. S., Paulus, M. P., Prouty, D., Zucker, R. A., & Sher, K. J. (2018). Demographic,  
1028 physical and mental health assessments in the adolescent brain and cognitive

- 1029 development study: Rationale and description. *Developmental Cognitive*  
1030 *Neuroscience*, 32, 55–66.
- 1031 102. Hagler DJ, Jr, Hatton, S., Cornejo, M.D., Makowski, C., Fair, D.A., Dick, A.S.,  
1032 Sutherland, M.T., Casey, B.J., Barch, D.M., Harms, M.P., Watts, R., Bjork, J.M.,  
1033 Garavan, H.P., Hilmer, L., Pung, C.J., Sicat, C.S., Kuperman, J., Bartsch, H., Xue, F.,  
1034 Heitzeg, M.M., Laird, A.R., Trinh, T.T., Gonzalez, R., Tapert, S.F., Riedel, M.C.,  
1035 Squeglia, L.M., Hyde, L.W., Rosenberg, M.D., Earl, E.A., Howlett, K.D., Baker, F.C.,  
1036 Soules, M., Diaz, J., de Leon, O.R., Thompson, W.K., Neale, M.C., Herting, M.,  
1037 Sowell, E.R., Alvarez, R.P., Hawes, S.W., Sanchez, W.K., Bodurka, J., Breslin, F.J.,  
1038 Morris, A.S., Paulus, M.P., Simmons, W.K., Polimeni, J.R., van der Kouwe, A.,  
1039 Nencka, A.S., Gray, K.M., Pierpaoli, C., Matochik, J.A., Noronha, A., Aklin, W.M.,  
1040 Conway, K., Glantz, M., Hoffman, E., Little, R., Lopez, M., Barch, V., Weiss, S.R.,  
1041 Wolff-Hughes, D.L., DelCarmen-Wiggins, R., Feldstein Ewing, S.W.,  
1042 MirandaDominguez, O., Nagel, B.J., Perrone, A.J., Sturgeon, D.T., Goldstone, A.,  
1043 Pfefferbaum, A., Pohl, K.M., Prouty, D., Uban, K., Bookheimer, S.Y., Dapretto, M.,  
1044 Galvan, A., Bagot, K., Giedd, J., Infante, M.A., Jacobus, J., Patrick, K., Shilling, P.D.,  
1045 Desikan, R., Li, Y., Sugrue, L., Banich, M.T., Friedman, N., Hewitt, J.K., Hopfer, C.,  
1046 Sakai, J., Tanabe, J., Cottler, L.B., Nixon, S.J., Chang, L., Cloak, C., Nagel, T., Reeves,  
1047 G., Kennedy, D.N., Heeringa, S., Peltier, S., Schulenberg, J., Sripada, C., Zucker, R.A.,  
1048 Iacono, W.G., Luciana, M., Calabro, F.J., Clark, D.B., Lewis, D.A., Luna, B., Schirda,  
1049 C., Brima, T., Foxe, J.J., Freedman, E.G., Mruzek, D.W., Mason, M. J., Huber, R.,  
1050 McGlade, E., Prescott, A., Renshaw, P.F., Yurgelun-Todd, D.A., Allgaier, N.A., Dumas,  
1051 J.A., Ivanova, M., Potter, A., Florsheim, P., Larson, C., Lisdahl, K., Charness, M.E.,  
1052 Fuemmeler, B., Hettema, J.M., Maes, H.H., Florsheim, J., Anokhin, A.P., Glaser, P.,  
1053 Heath, A.C., Madden, P.A., Baskin-Sommers, A., Constable, R.T., Grant, S.J., Dowling,

1054 G.J., Brown, S.A., Jernigan, T.L., Dale, A.M., 2019. Image processing and analysis  
1055 methods for the Adolescent Brain Cognitive Development Study. *NeuroImage*, 202,  
1056 116091.
